1 **Inhibition of arenavirus entry and replication by the cell-intrinsic**  
2 **restriction factor ZMPSTE24 is enhanced by IFITM antiviral activity**

3

4 Robert J Stott<sup>a</sup>, Toshana L Foster<sup>a\*</sup>

5

6 <sup>a</sup>Faculty of Medicine and Health Sciences, School of Veterinary Medicine and  
7 Science, The University of Nottingham, Sutton Bonington Campus, Loughborough,  
8 LE12 5RD, UK

9

10 \*Address correspondence to Toshana L Foster, [toshana.foster@nottingham.ac.uk](mailto:toshana.foster@nottingham.ac.uk)

11

12

13

14

15

16

## 17 **Abstract**

18 In the absence of effective vaccines and treatments, annual outbreaks of severe  
19 human haemorrhagic fever caused by arenaviruses, such as Lassa virus, continue to  
20 pose a significant human health threat. Understanding the balance of cellular factors  
21 that inhibit or promote arenavirus infection may have important implications for the  
22 development of effective antiviral strategies. Here, we identified the cell-intrinsic zinc  
23 transmembrane metalloprotease, ZMPSTE24, as a restriction factor against  
24 arenaviruses. Notably, CRISPR-Cas9-mediated knockout of ZMPSTE24 in human  
25 alveolar epithelial A549 cells increased arenavirus glycoprotein-mediated viral entry  
26 in pseudoparticle assays and live virus infection models. As a barrier to viral entry and  
27 replication, ZMPSTE24 may act as a downstream effector of interferon-induced  
28 transmembrane protein (IFITM) antiviral function; though through a yet poorly  
29 understood mechanism. Overexpression of IFITM1, IFITM2 and IFITM3 proteins did  
30 not restrict the entry of pseudoparticles carrying arenavirus envelope glycoproteins  
31 and live virus infection, yet depletion of IFITM protein expression enhanced virus entry  
32 and replication. Furthermore, gain-of-function studies revealed that IFITMs augment  
33 the antiviral activity of ZMPSTE24 against arenaviruses, suggesting a cooperative  
34 effect of viral restriction. We show that ZMPSTE24 and IFITMs affect the kinetics of  
35 cellular endocytosis, suggesting that perturbation of membrane structure and stability  
36 is likely the mechanism of ZMPSTE24-mediated restriction and cooperative  
37 ZMPSTE24-IFITM antiviral activity. Collectively, our findings define the role of  
38 ZMPSTE24 host restriction activity in the early stages of arenavirus infection.  
39 Moreover, we provide insight into the importance of cellular membrane integrity for  
40 productive fusion of arenaviruses and highlight a novel avenue for therapeutic  
41 development.

## 42 **Author Summary**

43 Increased human travel, virus genome evolution and expansion of the host rodent  
44 reservoir outside of endemic areas has contributed to increasing cases of the highly  
45 fatal arenaviral haemorrhagic disease, Lassa fever in Western Africa. These annual  
46 seasonal outbreaks present a serious global public health and socioeconomic burden,  
47 particularly in the absence of approved vaccines and antiviral countermeasures.  
48 Development of novel and effective therapeutic strategies against arenavirus infection  
49 is reliant on a better understanding of the molecular mechanisms of key host–virus  
50 interactions that antagonise or potentiate disease pathogenesis. We demonstrate the  
51 inhibition of arenavirus infection by the antiviral restriction factor ZMPSTE24 and  
52 describe a cooperative action with the innate immunity-stimulated family of interferon-  
53 induced transmembrane proteins (IFITMs). This work adds to our understanding of  
54 the mechanism of ZMPSTE24 and IFITM-mediated restriction of enveloped viruses  
55 and importantly suggests that these proteins may play a significant role in the  
56 pathogenesis of arenavirus infections.

57

## 58 **Keywords**

59 Arenavirus, Lassa virus, ZMPSTE24, interferon-induced transmembrane proteins  
60 (IFITMs), restriction factors

61

62

63

64

65

66

## 67 **Introduction**

68 Viral haemorrhagic fevers (VHF) caused by mammarenaviruses pose a serious public  
69 health burden in endemic regions. Based on their phylogenetic and antigenic  
70 properties and geographical distribution, mammarenaviruses are classified into the Old  
71 World (OW) virus complex endemic to Western Africa and the New World (NW) virus  
72 complex found in South America (1, 2). Junín virus (JUNV), the causative agent of  
73 Argentinian haemorrhagic fever (AHF) is included within the NW group along with the  
74 other human pathogens Machupo (MACV) and Chapare (CHAPV) viruses (3, 4). The  
75 OW group includes the clinically significant, prototypic arenavirus lymphocytic  
76 choriomeningitis virus (LCMV) which is distributed worldwide, and the pathogenic Lujó  
77 virus (LUJV) associated with an outbreak of VHF in South Africa and Zambia (5). The  
78 most prevalent mammarenavirus pathogen, OW Lassa virus (LASV) is the causative  
79 agent of human Lassa Fever (LF) and is associated with significant mortality and  
80 morbidity in affected West African countries. Increased human interactions with the  
81 rodent host reservoir, mainly *Mastomys natalensis*, have led to the emergence and re-  
82 emergence of LF disease (6-9). Particularly Nigeria reports continued outbreaks of LF,  
83 resulting in tens of thousands of cases and lead to case fatality rates as high as 30%  
84 (10, 11). Recent expansion of LASV outside of endemic regions has further highlighted  
85 the immense risk to human health in the absence of effective and approved  
86 countermeasures (12-15). A distinct characteristic of OW and NW mammarenaviruses  
87 is that both groups contain human pathogenic and non-pathogenic strains (1). For  
88 example, OW Mopeia virus (MOPV) is known to be non-pathogenic to humans, yet it  
89 is phylogenetically closely related to LASV and has been shown to induce protective  
90 immunity against LASV in a non-human primate model (16-18). In the case of LASV,  
91 infections can be asymptomatic or result in illnesses ranging from mild flu-like

92 syndromes to severe and highly fatal haemorrhagic zoonoses (19). Thus, unravelling  
93 the immune responses and key virus-host interactions that influence this variation in  
94 disease severity is critical.

95 The innate antiviral response provides an early line of defense against infection  
96 through the activity of cell-intrinsic proteins and the induction of type I interferon  
97 (IFN1)–stimulated genes (ISGs) that encode virus restriction factors (20, 21). These  
98 innate restriction factors block specific steps of the viral life cycle, including fusion of  
99 the viral membrane of enveloped viruses, a critical determinant for establishing  
100 infection (21-24). Fusion is mediated by the viral fusion glycoproteins that usually  
101 undergo conformational changes upon receptor binding and/or induction by acidic pH  
102 in endosomal compartments of the cell (25-28). The viral and cellular membrane  
103 leaflets merge to form a hemifusion diaphragm. Lipid mixing between the two leaflets  
104 then leads to the formation of a fusion pore, through which viral content is released  
105 into the cytoplasm to initiate the replication process (29, 30).

106 Several restriction factors potently inhibit the infection of diverse enveloped viruses  
107 (31, 32). Amongst these factors are the interferon-induced transmembrane proteins  
108 (IFITMs) and the zinc metalloprotease, ZMPSTE24 (33, 34). As part of the robust IFN-  
109 mediated innate immune response to viral infection, the IFITMs 1, 2 and 3 display  
110 broad-range antiviral activity against a plethora of enveloped viruses including  
111 orthomyxoviruses (influenza A virus, IAV), retroviruses (human immune deficiency  
112 virus-1, HIV-1), coronaviruses (severe acute respiratory syndrome (SARS)  
113 coronaviruses SARS-COV-1 and SARS-CoV-2), flaviviruses (Dengue) and filoviruses  
114 (Ebola) (35-39). IFITM1 localises predominantly to the plasma membrane, whilst  
115 IFITMs 2 and 3 localise to early and late endosomal and lysosomal membranes (21,

116 40). Current mechanisms of virus restriction are not clearly understood but existing  
117 explanations suggest that IFITMs inhibit viral fusion through a proximity-based  
118 mechanism (36, 39). This is proposed to require the presence of IFITMs at the site of  
119 viral fusion where they inhibit the formation of the fusion pore by trapping this process  
120 at the hemifusion stage. IFITM homo-oligomerisation is thought to directly modify the  
121 structure, rigidity and curvature of target membranes, thus leading to a block in virus-  
122 host fusion (36, 41). Indirect mechanisms have also been suggested, such as through  
123 alteration of membrane cholesterol composition or through endosomal association  
124 with other membrane proteins, such as ZMPSTE24 (34).

125 ZMPSTE24, a seven-pass transmembrane protein, has recently been shown to be an  
126 intrinsic restriction factor against a number of enveloped viruses, including IAV, Ebola,  
127 vaccinia and Zika (33). ZMPSTE24 is constitutively expressed and localises to the  
128 inner nuclear membrane, and to multiple intracellular endocytic membrane  
129 compartments. The conserved enzymatic activity of ZMPSTE24 plays a crucial role in  
130 the maturation of the nuclear scaffold protein lamin A which is critical for nuclear  
131 structure, shape and function (42). Recent studies suggest an indirect mechanism of  
132 ZMPSTE24 inhibition of enveloped virus fusion, independent of this enzymatic activity,  
133 through alteration of membrane structure or endosomal trafficking, similar to the IFITM  
134 proteins (33). ZMPSTE24 has been identified as a protein-interaction partner of  
135 IFITMs and recruitment of ZMPSTE24 as a downstream effector of IFITM antiviral  
136 activity has been suggested to drive the alteration in membrane properties that are  
137 less conducive to viral fusion (34). However, the exact mechanism of this proposed  
138 cooperative restriction is currently unknown.

139 Different viruses can initiate fusion in distinctive endosomal and lysosomal  
140 compartments and thus can display differential sensitivity to restriction factor

141 expression. Arenavirus entry into target cells is mediated by the glycoprotein spike  
142 complex GP, consisting of subunits GP1, GP2 and the stable signal peptide (SSP).  
143 GP1 binds to entry receptors at the plasma membrane and effective fusion is driven  
144 by stabilisation of receptor-GP complexes by GP2 and SSP (43). During OW and NW  
145 virus co-divergence, cell receptor usage evolved from the ubiquitously expressed  $\alpha$ -  
146 dystroglycan receptor (OW) to the transferrin 1 receptor (NW), with the exception of  
147 OW LUJV which uses neuropilin-2 (NRP-2) as the entry receptor (28, 44). Virus entry  
148 occurs either via clathrin-dependent (NW viruses) or independent receptor-mediated  
149 (OW viruses) endocytosis followed by low-pH induced conformational changes in GP  
150 structure that lead to productive fusion (45). For OW LASV, low pH triggers a switch  
151 from the  $\alpha$ -dystroglycan receptor to the lysosome-associated membrane protein 1  
152 (LAMP1), whilst for OW LUJV a pH-induced switch to the tetraspanin CD63 mediates  
153 fusion with cellular membranes (26).

154 To date, there is limited information about how arenavirus infections may be  
155 antagonised by host restriction factors (32, 46, 47), and also the putative role of  
156 ZMPSTE24 in arenavirus biology has not yet been explored. Given that ZMPSTE24  
157 is an important innate defence factor against a number of pathogenic viruses, it is  
158 conceivable that ZMPSTE24 may affect the viral endocytic entry process of  
159 arenaviruses. In this study, we examined whether ZMPSTE24 is involved in arenavirus  
160 entry restriction. Using complementary arenavirus GP-pseudoparticle (GPpp) and live  
161 MOPV infection assays, we demonstrated that ZMPSTE24 restricts the entry and  
162 replication of arenaviruses. In agreement with previous reports, we found that  
163 arenavirus entry was resistant to IFITM protein overexpression (39, 48). However,  
164 siRNA knockdown and CRISPR-Cas9 knockout of IFITMs enhanced arenavirus entry  
165 and replication, contrary to our expectations. We found that IFITM3 overexpression

166 in the presence of ZMPSTE24 augmented restriction of arenavirus entry and  
167 replication and showed that ZMPSTE24 and IFITM3 can alter cellular endocytosis  
168 rates possibly by impacting on the rigidity of cell membranes in an independent or  
169 cooperative manner. Collectively, our results provide strong support that arenaviruses  
170 utilise an endocytic pathway that is sensitive to ZMPSTE24 restriction and is enhanced  
171 upon recruitment of IFITM3.

## 172 **Results**

### 173 **ZMPSTE24 impairs arenavirus GPpp infection**

174 The broad-spectrum intrinsic restriction factor ZMPSTE24 blocks the endocytic entry  
175 of a number of enveloped viruses (33). We used arenavirus GP–pseudoparticles  
176 (GPpp) generated from a panel of OW (LCMV, LASV, LUJV, MOPV) and NW (JUNV,  
177 MACV, CHAPV) mammarenavirus representatives to examine the role of ZMPSTE24  
178 restriction during arenavirus entry. Specifically, murine leukaemia virus (MLV)  
179 packaging a green fluorescent protein (GFP) reporter was pseudotyped with different  
180 arenavirus GP proteins. Using flow cytometry analysis, we first investigated the  
181 infectivity of these arenavirus GPpp in A549 human lung epithelial cells stably over-  
182 expressing FLAG-tagged ZMPSTE24 compared to vector control cells. Entry of both  
183 OW and NW arenavirus GPpp were similarly susceptible to restriction by  
184 overexpression of ZMPSTE24 (Fig 1A). To examine the importance of ZMPSTE24  
185 metalloprotease activity in the restriction of arenavirus GPpp entry, we mutated  
186 histidine residue 335 within the essential, conserved HEXXH zinc metalloprotease  
187 catalytic motif and demonstrated that the H335A mutant also displayed comparable  
188 restriction of LCMVpp and LASVpp infection to wild-type ZMPSTE24 in A549 cells  
189 when compared with vector only controls, albeit to a slightly lesser extent (Fig 1B).



190 Therefore, the combined data suggest that ZMPSTE24 impedes arenavirus infection  
 191 but that this viral restriction activity is largely independent of its protease function.  
 192

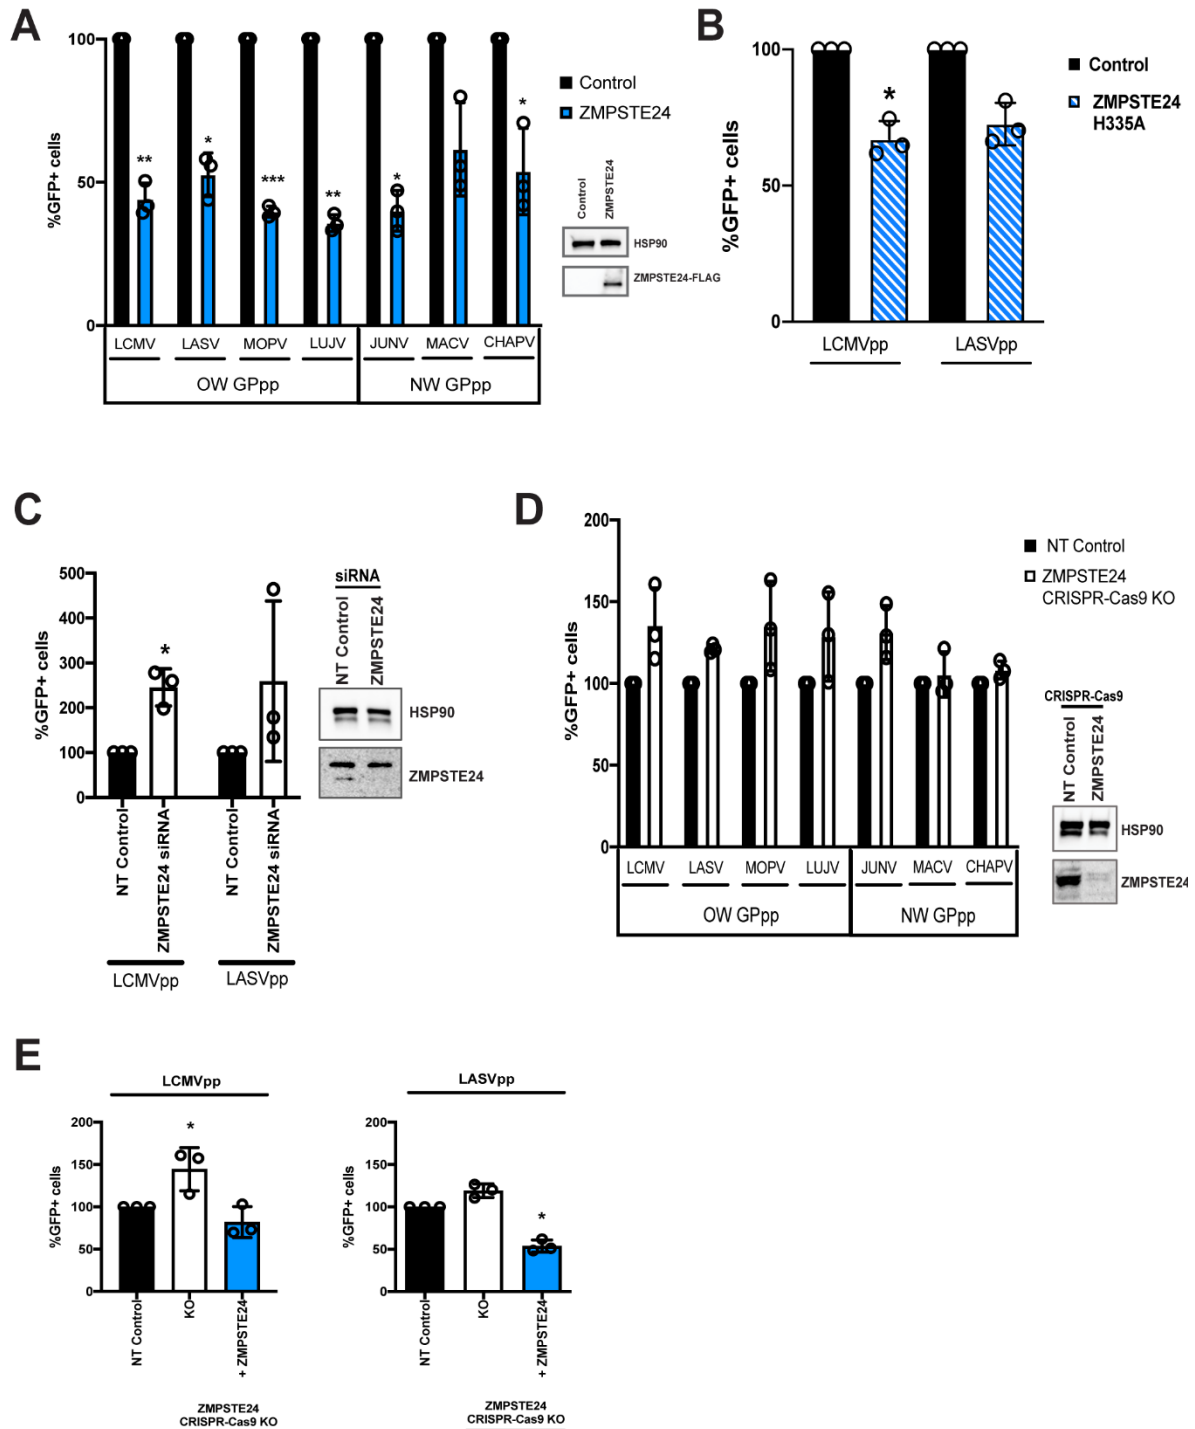

**Fig 1. Entry of arenavirus GPpp is inhibited by ZMPSTE24.** GFP-containing arenavirus GP-pseudoparticles (GPpp) generated from a panel of Old World (OW) and New World (NW) arenaviruses namely, LCMV, LASV, MOPV, LUJV, JUNV, MACV and CHAPV were

used to infect: **(A)** A549 cells stably transduced with vector control or ZMPSTE24-FLAG (inset), **(B)** A549 cells stably expressing vector control or ZMPSTE24 with a H335A mutation, **(C)** A549 cells with ZMPSTE24 expression silenced by siRNA knockdown (inset, HSP90 served as a loading control), **(D)** CRISPR-Cas9 mediated knockout (KO) of ZMPSTE24 in A549 cells (inset) or **(E)** A549 cells stably transduced with non-targeting (NT) control, CRISPR-Cas9 KO of ZMPSTE24 or CRISPR-Cas9 KO of ZMPSTE24 in combination with ZMPSTE24-FLAG overexpression. Sensitivity to ZMPSTE24 restriction was measured by flow cytometry and is expressed as % GFP positive cells in relation to corresponding controls. Unpaired t-test \*\*\*  $p < 0.001$ , \*\*  $p < 0.01$ , \*  $p < 0.05$ . Data are expressed as mean  $\pm$ SEM from samples produced in triplicate.

193 To corroborate the inhibitory effect of ZMPSTE24 on the entry of arenaviruses, we  
194 silenced the expression of ZMPSTE24 by performing siRNA knockdown (KD) studies  
195 in A549 cells. We found that LCMVpp and LASVpp infection was enhanced 2.5-fold in  
196 ZMPSTE24 KD cells compared to the scramble control siRNA (Fig 1C). To build on  
197 the siRNA knockdown data, given that the knockdown by western blot was apparently  
198 not complete, we depleted the expression of ZMPSTE24 in A549 cells using CRISPR-  
199 Cas9 lentiviral vectors. Cells were screened by western blotting to confirm the  
200 depletion of ZMPSTE24 expression in the knockout (KO) cells. Infection by most OW  
201 and NW arenavirus GPpp was markedly increased in the ZMPSTE24 knockout cells  
202 compared to unmodified control cells (Fig 1D). To further confirm the role of  
203 ZMPSTE24 as an intrinsic host factor against arenavirus GPpp entry, we modified the  
204 ZMPSTE24 KO A549 cells to stably express C-terminally FLAG-tagged ZMPSTE24  
205 by retroviral transduction (Fig 1E). We observed less infection with LCMVpp and  
206 LASVpp in the ZMPSTE24-expressing cells compared to the ZMPSTE24 KO cells.  
207 Collectively, by using single-round GPpp infection assays, we have identified  
208 ZMPSTE24 as a host restriction factor against arenavirus entry.

209

210 **Arenavirus GPpp entry is resistant to IFITM restriction but depletion of IFITM**  
211 **expression enhances infection**

212 It has been suggested that ZMPSTE24 is recruited to endocytic compartments by  
213 IFITM proteins, thereby blocking the endocytic entry of enveloped viruses (33, 34). We  
214 aimed to examine the role that IFITMs play in the restriction activity against  
215 arenaviruses. As IFITMs are induced by IFN stimulation, we first assessed the antiviral  
216 effects of exogenous IFN1 on the early stages of arenavirus infection in A549 cells.  
217 As measured by flow cytometry, single-round infectivity of GPpp across OW and NW  
218 strains was markedly reduced in cells incubated with 1000U/ml universal IFN1,  
219 suggesting an IFN-mediated inhibition of arenavirus entry (Fig 2A). It has previously  
220 been reported that arenaviruses are not susceptible to inhibition by the broadly acting  
221 IFN1-stimulated family of IFITM proteins (39, 48). To further validate this, we  
222 generated A549 cells stably expressing individual human IFITM1, IFITM2 and IFITM3  
223 proteins at levels similar in magnitude to that induced by IFN1 treatment (Fig 2B). By  
224 contrast, the expression of endogenous ZMPSTE24 was not upregulated following  
225 treatment with IFN1. We analysed the infectivity of different arenavirus GPpp in these  
226 cells and found that all strains tested were resistant to antiviral IFITM activity (Fig 2C),  
227 which is in agreement with previous studies (39, 48).

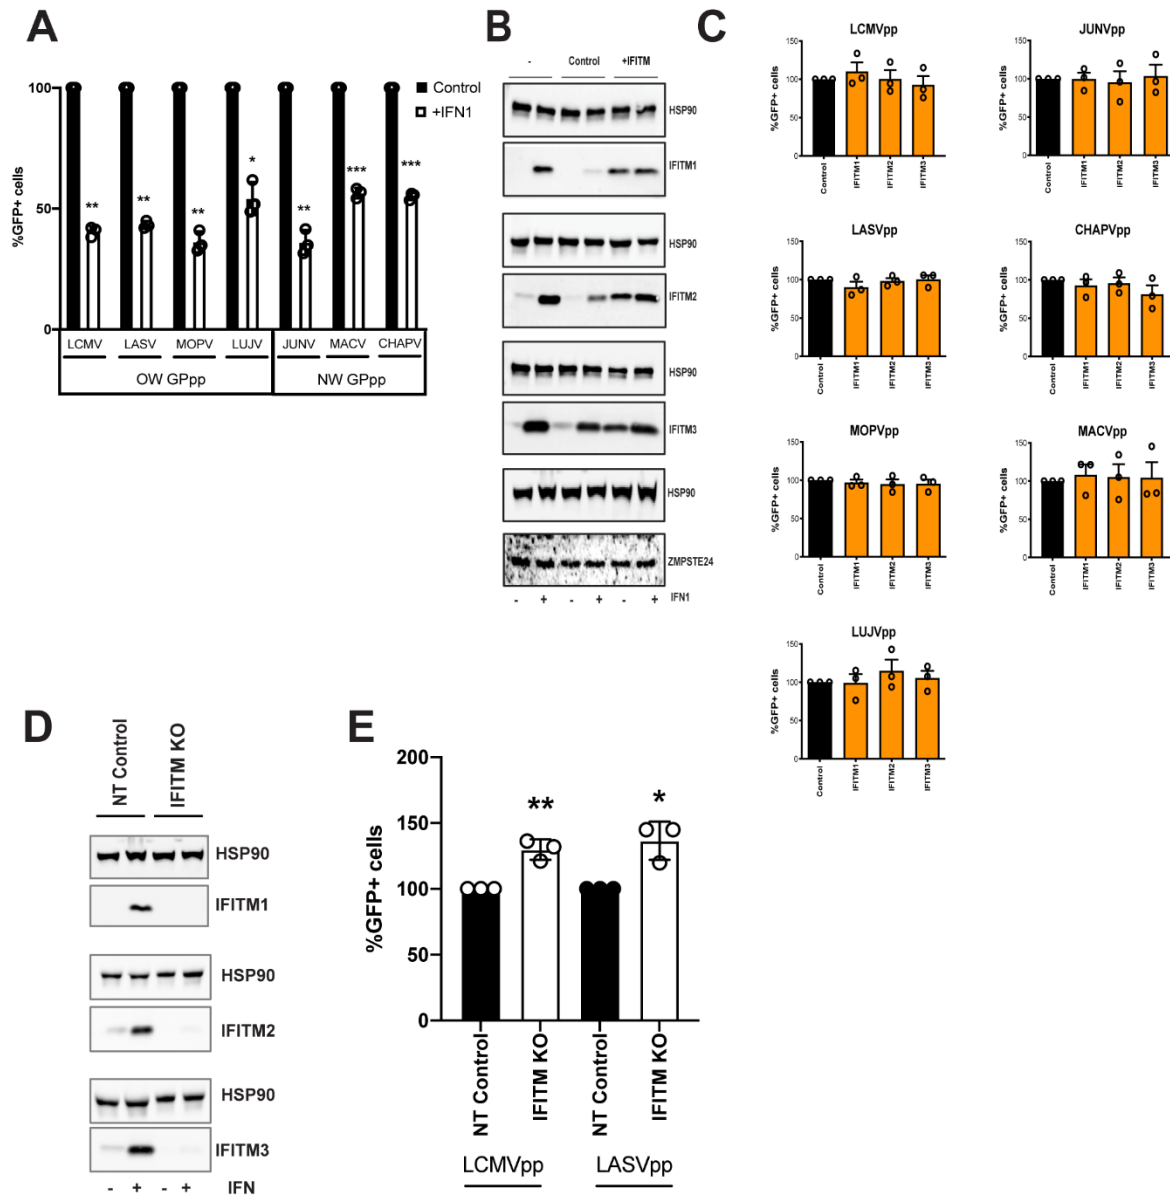

**Fig 2. Arenavirus GPpp are not susceptible to restriction by IFITM overexpression.**

**(A)** A549 cells were infected with arenavirus GPpp for 48 h in the presence of 1000 U/mL type 1 IFN (IFN1) or control media and the percentage of infected cells compared to control was determined by flow cytometry. Unpaired t-test \*\*\*  $p < 0.001$ , \*\*  $p < 0.01$ , \*  $p < 0.05$ . **(B)** A549 cells were transduced with empty vector control pLHCX, IFITM1, IFITM2 or IFITM3. Expression of IFITMs and ZMPSTE24 was measured in the presence or absence of 1000 U/mL IFN1 by western blot analysis. HSP90 served as a loading control. **(C)** A549 cells stably transduced with IFITMs were infected with arenavirus GPpp and % infectivity measured by flow cytometry. **(D)** CRISPR-Cas9 mediated knockout (KO) of IFITMs in A549 cells was confirmed by western blot analysis in the presence or absence of 1000 U/mL IFN1. **(E)** A549 IFITM CRISPR-Cas9 KO cells were infected with LCMV or LASV GPpp for 48 h

and the percentage of infected cells compared to control was determined by flow cytometry. Unpaired t-test \* $p < 0.05$ . Data are expressed as mean  $\pm$ SEM from experiments in triplicate.

228

229 To assess whether the depletion of endogenous IFITMs may alter the efficiency of  
230 arenavirus GPpp infection, we used CRISPR-Cas9 lentiviral vectors to target IFITM  
231 expression in A549 cells. As observed by western blotting, the IFITM3 guide RNA  
232 (gRNA) used resulted in effective depletion of the specific IFITM targeted but also  
233 resulted in the depletion of IFITM2 and IFITM1, given their high degree of homology,  
234 chromosomal positioning and close proximity (Fig 2D). Knockout of endogenous  
235 IFITM expression enhanced the infection mediated by LCMVpp and LASVpp, implying  
236 that IFITMs may contribute to the inhibition of arenavirus GP-mediated viral entry,  
237 possibly through co-factor interactions (Fig 2E).

238

### 239 **IFITMs contribute to the antiviral restriction of arenavirus entry by ZMPSTE24**

240 To address the effects of IFITMs on ZMPSTE24 activity, we first assessed the  
241 comparative localisation of the host restriction factors. Immunofluorescence  
242 microscopy imaging showed that overexpressed HA-tagged ZMPSTE24 possesses a  
243 cytoplasmic distribution and predominantly localises to endosomal compartments in  
244 A549 cells. Further, we found that ZMPSTE24 co-localises with the early endosome  
245 marker, EEA1 and to a lesser extent with the late endosome marker Rab9, but does  
246 not localise to the lysosome marker LAMP1 (Fig S1). The localisation of IFITM proteins  
247 is thought to define the spectrum of viruses that these antiviral factors restrict (23).  
248 IFITM1 is mostly localised to the plasma membrane, whilst IFITMs 2 and 3, like  
249 ZMPSTE24, are localised to endosomal compartments due to the presence of a  
250 conserved endocytic localisation motif (21, 23). We further demonstrated by confocal

251 microscopy imaging that endogenous ZMPSTE24 co-localises with all three HA-  
252 tagged IFITM proteins when overexpressed in A549 cells (Fig 3A). In the presence of  
253 IFITM1, ZMPSTE24 redistributed to the plasma membrane and IFITM1 was also  
254 found to have a disperse intracellular punctate distribution that overlapped with  
255 ZMPSTE24. This observation implies a cooperative function or interaction of the two  
256 proteins (Fig 3A). Considering these observations, we next corroborated that IFITMs  
257 and ZMPSTE24 interact (33, 34). A549 cells were transfected with C-terminally FLAG-  
258 tagged ZMPSTE24. Proteins were captured on beads coated with anti-IFITM2/3  
259 antibody and analysed by western blot. IFITM proteins have the propensity to homo-  
260 and hetero-oligomerise and we found that ZMPSTE24-FLAG binds to the endogenous  
261 IFITM1, 2 and 3 proteins (Fig 3B) (41). Complementary to these co-  
262 immunoprecipitation data, we assessed the interaction between ZMPSTE24 and  
263 specifically, IFITM3, in live cells using a NanoLuc Binary Technology (NanoBiT)-based  
264 assay (Fig 3C). NanoLuc Luciferase is split into two complementary segments, 18kDa  
265 Large BiT (LgBiT) and 1.3kDa Small BiT (SmBiT); these possess low intrinsic affinity  
266 for each other. However, a bright luminescent signal is restored upon interaction of  
267 the binding partners to which they are fused. We engineered ZMPSTE24 and IFITM3  
268 constructs tagged at either the N or C terminus with SmBiT and LgBiT fragments (Fig  
269 3C). We transiently transfected HEK293T cells with these combinations of  
270 SmBiT/LgBiT ZMPSTE24 and IFITM3 constructs to screen for conformational  
271 interactions by detection of a luminescence signal. As IFITMs are known to  
272 oligomerize via the N-terminus, we included a co-transfection of N-terminal LgBiT-  
273 IFITM3 (N-L-IFITM3) and N-terminal SmBiT-IFITM3 (N-S-IFITM3) as indication of a  
274 positive interaction. Luminescence signal was also compared to the manufacturer's  
275 PRKACA:PRKAR2A positive control pair and the negative control of the

276 corresponding SmBiT partner fused with a HaloTag. Co-transfection of N-L-IFITM3  
277 and N-S-IFITM3 produced a robust signal when normalised to the negative control,  
278 indicating the oligomerisation of IFITM proteins (Fig 3C). We found that C-terminal  
279 tagged ZMPSTE24 (ZMPSTE24-C-S) and IFITM3 (IFITM3-C-L) in combination  
280 produced a luminescent signal approximately 12-fold higher than that of the negative  
281 control pairs and approaching the signal of the N-L-IFITM3/N-S-IFITM3 combination  
282 (Fig 3C). Thus, these data are in keeping with previous findings that suggest the two  
283 host restriction factors may interact (33).

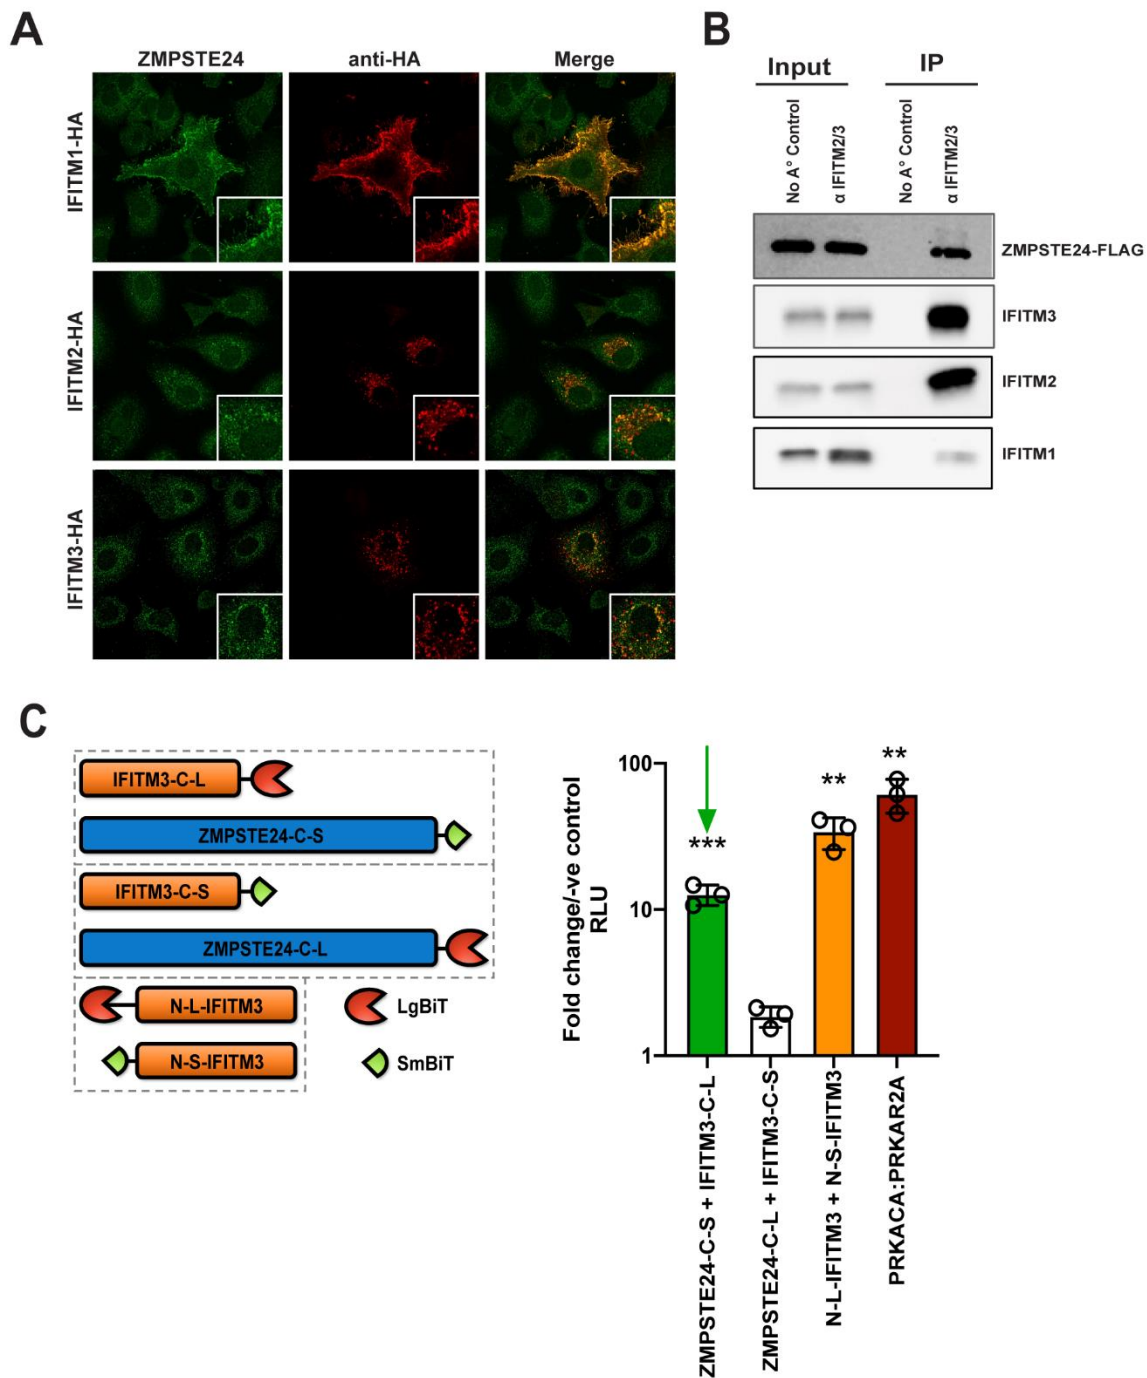

**Fig 3. ZMPSTE24 colocalises with IFITM proteins, and interacts via a C-terminal interaction with IFITM3 (A)** Confocal microscopy of A549 cells transiently transfected with HA-tagged IFITM proteins 1, 2 and 3. At 24 h post-transfection, cells were fixed and stained for endogenous ZMPSTE24 (green) and the IFITM protein of interest (red) and examined by confocal microscopy. Panels are of representative images. **(B)** A549 cells were transfected with ZMPSTE24-FLAG and 48 h later, cell lysates were immunoprecipitated with anti-IFITM2/3 monoclonal antibody. Cell lysates and immunoprecipitates were analysed by SDS-PAGE and western blotting for ZMPSTE24-FLAG and IFITMs 1, 2 and 3. **(C)**



IFITM3 or ZMPSTE24 were fused to a large (LgBiT) or small (SmBiT) subunit of NanoLuc luciferase and co-transfected into HEK293T cells. For each assay pair (hatched boxes), the LgBiT fused partner was also co-transfected with a HaloTag fused to SmBiT as a negative control. LgBiT-PRKACA and SmBiT-PRKAR2A were co-transfected as a positive control. **(D)** Luminescence was measured after addition of NanoGlo luciferase reagent and is expressed as relative luminescence units (RLU) relative to corresponding LgBiT and SmBiT-HaloTag negative control. Unpaired t-test \*\*\*  $p < 0.001$ , \*\*  $p < 0.01$ , \*  $p < 0.05$ . Data are expressed as mean  $\pm$ SEM from experiments in triplicate. Green arrow indicates interaction between ZMPSTE24-C-SmBiT and IFITM3-C-LgBiT.

284 We next aimed to ascertain if IFITMs play a role in the ZMPSTE24-mediated restriction  
285 of arenavirus entry. We assessed the infectivity of LCMVpp and LASVpp in A549 cells  
286 with CRISPR-Cas9 KO of endogenous ZMPSTE24 and overexpressing either  
287 ZMPSTE24-FLAG or IFITM3, or both proteins together by retroviral transduction (Fig  
288 S2, Fig 4A). As anticipated, ZMPSTE24 knockout increased LCMVpp and LASVpp  
289 infection but this was abrogated in the presence of ZMPSTE24-FLAG. IFITM3  
290 overexpression alone had little effect on GPpp infection but in combination with  
291 ZMPSTE24-FLAG, we observed a significant enhancement in the restriction of  
292 LCMVpp and LASVpp infection (Fig 4B). Interestingly, when we examined A549 cells  
293 overexpressing ZMPSTE24 and IFITM3 in combination, we found that ZMPSTE24 co-  
294 expression led to a redistribution of IFITM3 from the disparate endo-cytoplasmic  
295 localisation to a distinct endosomal localisation that overlaps with ZMPSTE24  
296 expression (Fig 4B). Thus, we speculate that this redistribution of IFITM3 likely  
297 influences the observed enhancement in ZMPSTE24 restriction of arenavirus entry.

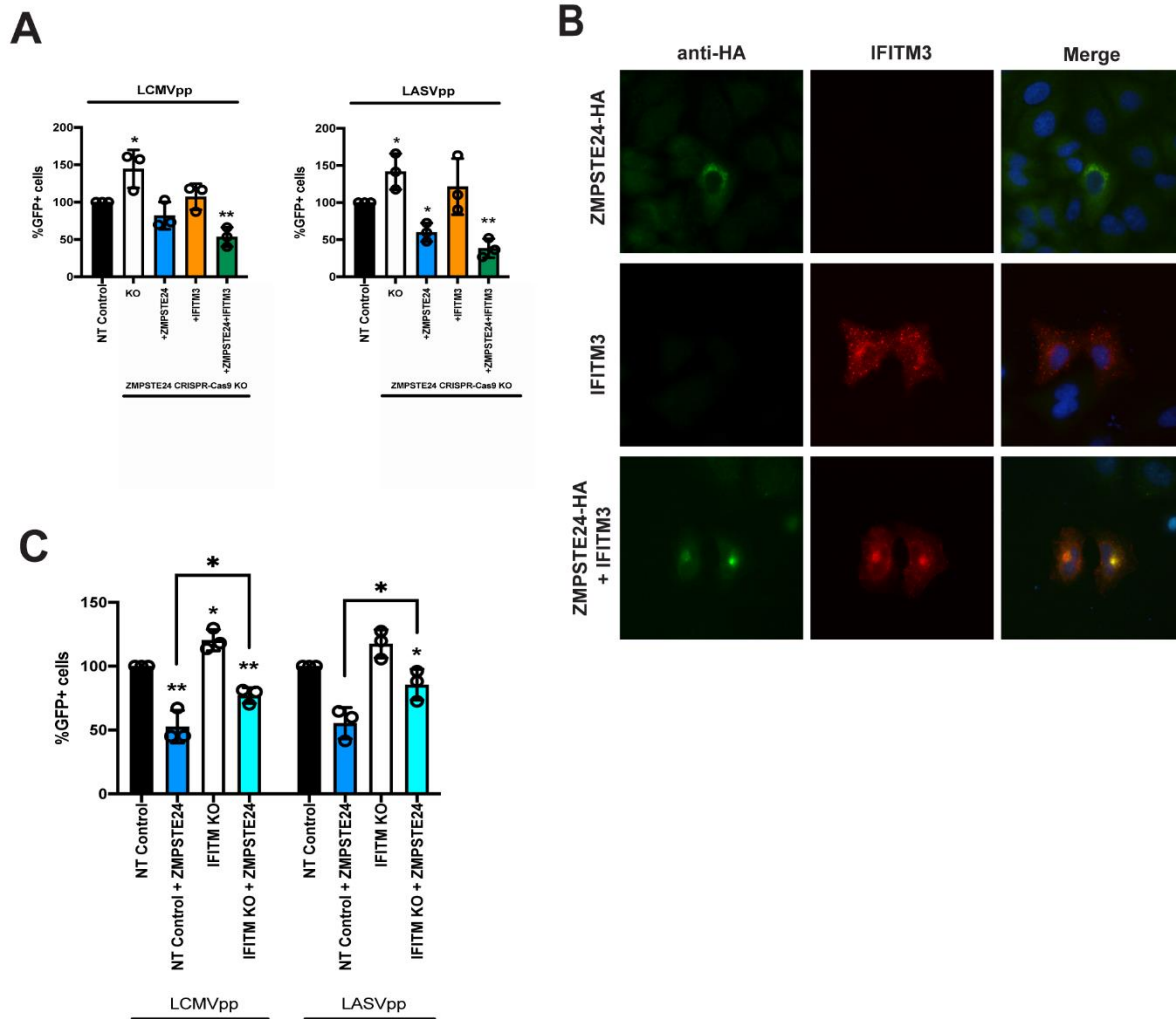

**Fig 4. ZMPSTE24 and IFITM3 co-operatively restrict arenavirus GPpp infection. (A)** A549 CRISPR-Cas9 stable knock out cell lines were generated for non-targeting (NT) control or ZMPSTE24 and then transduced for stable overexpression of ZMPSTE24-FLAG or IFITM3 or both. Cells were infected with LCMVpp or LASVpp for 48 h and the percentage of infected cells compared to control was determined by flow cytometry. Unpaired t-test \*\*  $p < 0.01$ , \*  $p < 0.05$ . **(B)** A549 cells transiently transfected with HA-tagged ZMPSTE24 (green) and IFITM3 (red) were stained to assess the co-localisation of the two proteins 24 h post-transfection. Panels are of representative images. **(C)** A549 CRISPR-Cas9 NT control or IFITM KO cells ectopically expressing ZMPSTE24-FLAG were infected with LCMVpp or LASVpp. At 48 h post transfection the percentage of infected cells compared to control was determined by flow cytometry. Unpaired t-test \*\*  $p < 0.01$ , \*  $p < 0.05$ . Data are expressed as mean  $\pm$ SEM from samples produced in triplicate.

299 We next generated A549 lentiviral non-targeting (NT) control and CRISPR-Cas9  
300 IFITM knockout cells and stably expressed ZMPSTE24-FLAG in these cells.  
301 Compared to NT control cells, we observed enhanced LCMVpp and LASVpp infection  
302 in IFITM KO cells (Fig 4C). Overexpression of ZMPSTE24 in NT control cells  
303 abrogated LCMVpp and LASVpp infection but in the absence of IFITM expression, the  
304 sensitivity of arenavirus entry to ZMPSTE24 restriction was decreased (Fig 4C).  
305 Taken together, our data show that ZMPSTE24 interacts with IFITM proteins and  
306 importantly suggest a cooperative impairment of arenavirus entry in which ZMPSTE24  
307 appears to co-opt IFITM3 to facilitate restriction of arenavirus entry.

308

### 309 **Replication of OW MOPV is restricted by ZMPSTE24**

310 We established that ZMPSTE24 can restrict the early stages of arenavirus infection  
311 through the use of GPpp infection assays and found that ZMPSTE24 interaction with  
312 IFITM proteins markedly increased the sensitivity of arenavirus-mediated entry to  
313 ZMPSTE24, suggesting a cooperative function. The replication of MOPV is highly  
314 sensitive to IFN1 inhibition, thus we next wanted to determine whether IFITM-  
315 mediated restriction contributed to this inhibition and to assess the impact of  
316 ZMPSTE24 on live virus replication (Fig 5A). Using lentiviral CRISPR-Cas9 ZMPSTE24  
317 gRNA and siRNAs against IFITMs 1, 2 and 3, we first knocked out or knocked down  
318 endogenous protein expression from A549 cells and challenged the cells with MOPV  
319 (Fig 5B, C). Levels of MOPV NP and L RNA in these cells were quantified by RT-  
320 qPCR at 72 hours post-infection. We found that ZMPSTE24 depletion markedly  
321 increased the level of viral replication observed. This was reflected in the 4-6-fold  
322 increase in MOPV NP and L RNA levels in the absence of ZMPSTE24 expression,  
323 indicating that in these cells ZMPSTE24 is likely a component of the induced antiviral

324 state upon arenavirus infection (Fig 5B). Likewise, knockdown of IFITM protein  
 325 expression, particularly of IFITMs 2 and 3 significantly enhanced MOPV NP and L  
 326 RNA levels (Fig 5C).

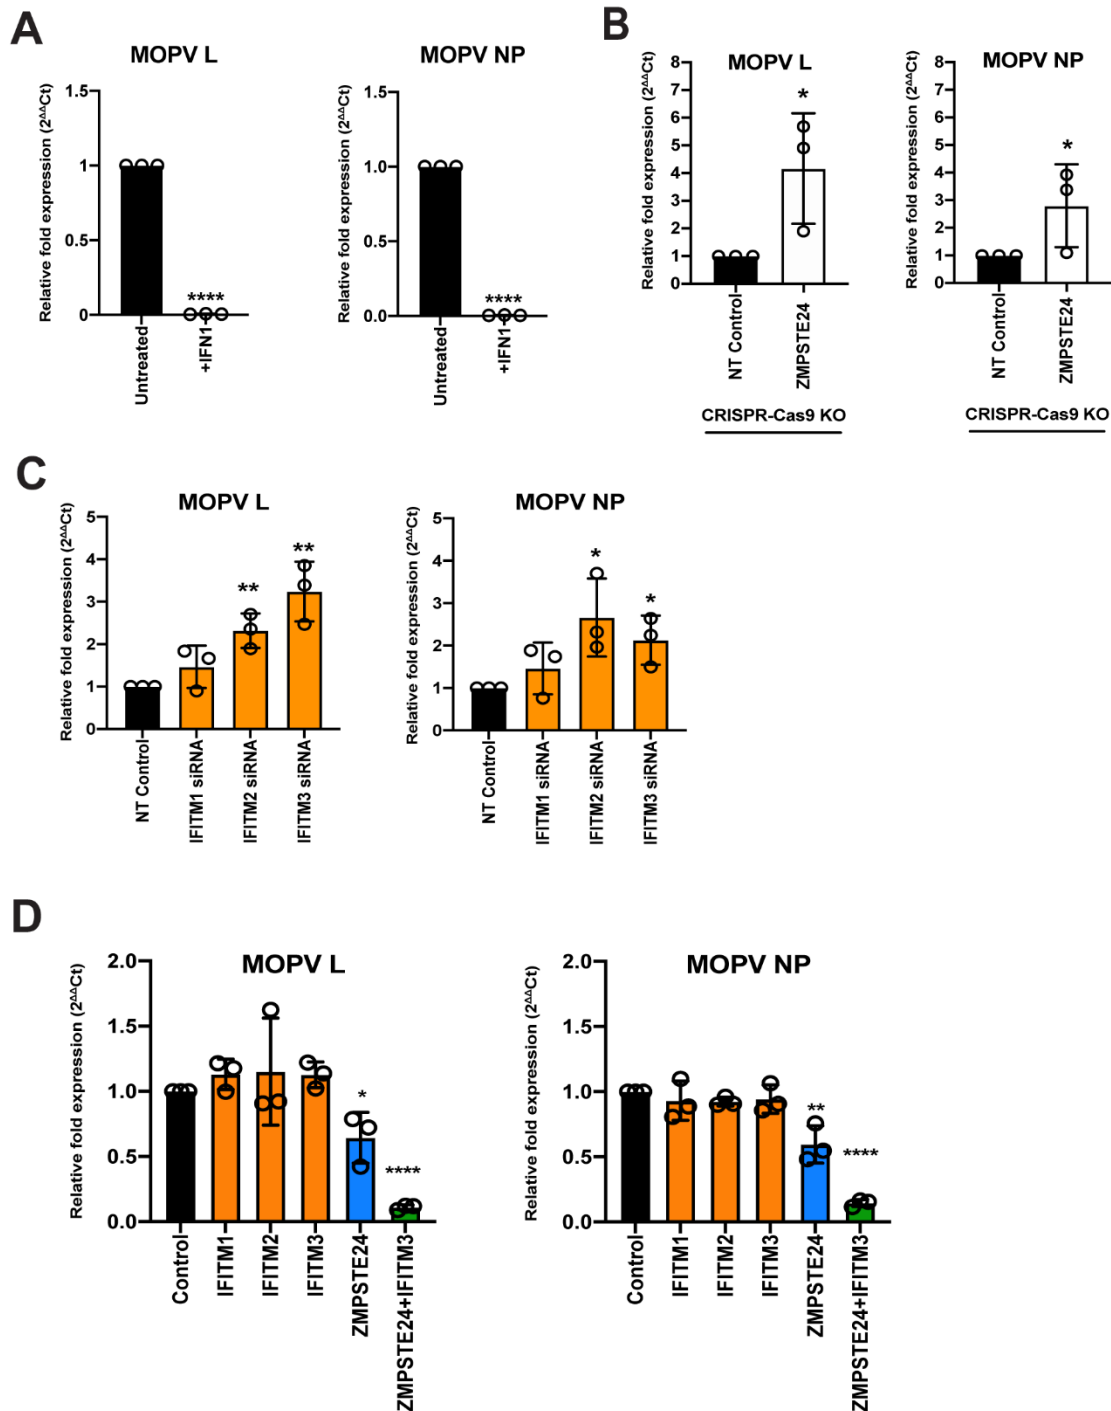

**Fig 5. MOPV replication is sensitive to ZMPSTE24 restriction. (A)** MOPV gene expression analysis in A549 cells incubated with 1000 U/mL type 1 IFN (IFN1) for 4 h prior to, and during infection with MOPV. Unpaired t-test \*\*\*\* $p < 0.0001$ . **(B)** Gene expression in

A549 cells with stable CRISPR-Cas9 knockout (KO) of ZMPSTE24 infected with MOPV. Unpaired t-test \* $p < 0.05$ . **(C)** MOPV gene expression in A549 cells stably expressing siRNA-mediated knockdown of IFITMs. Unpaired t-test \*\*  $p < 0.01$ , \* $p < 0.05$ . **(D)** Gene expression analysis in A549 cells stably expressing IFITMs 1, 2 or 3, ZMPSTE24 or both ZMPSTE24 and IFITM3 and infected with MOPV. All cells were infected with MOPV at MOI 0.01 for 72 h. Unpaired t-test \*\*\*\* $p < 0.0001$ , \*\*  $p < 0.01$ , \* $p < 0.05$ . All samples were collected by RNA extraction and cDNA synthesis before analysing by RT-qPCR with primers for MOPV L and NP genes. Data was analysed by the  $2^{-\Delta\Delta Ct}$  method with primers for reference genes  $\beta$ -actin and GAPDH. Values are expressed as means  $\pm$ SEM relative to controls of samples performed in triplicate.

327 To further address the effects of ZMPSTE24 and IFITM activity on live virus replication,  
328 we generated stable A549 cell lines expressing each human IFITM protein,  
329 ZMPSTE24 or expressing ZMPSTE24 in combination with IFITM3 (Fig S3, Fig 5D).  
330 We then infected these cells with MOPV with a multiplicity of infection (MOI) of 0.01,  
331 and found that there was little to no sensitivity to IFITM protein expression but  
332 significant sensitivity to ZMPSTE24. The reduction of MOPV gene expression in cells  
333 expressing ZMPSTE24 was further enhanced when IFITM3 was co-expressed (Fig  
334 5D). Both single round arenavirus GPpp assays and multicycle replication studies with  
335 live MOPV v therefore show sensitivity to ZMPSTE24 restriction that is specifically  
336 enhanced in the presence of IFITM3 expression. These data are highly suggestive of  
337 an antiviral role of ZMPSTE24 and the IFITM cofactors in arenavirus cellular entry.

338

339 **ZMPSTE24 restriction of arenavirus infection is mediated through modulation**  
340 **of membrane integrity**

341 The molecular mechanism of ZMPSTE24 and IFITM antiviral activity are not well  
342 characterised (33, 34, 49). Findings from previous studies suggest that these proteins  
343 restrict the fusion of viruses by altering the fluidity or curvature of the host and viral

344 membranes, through indirect alteration of the lipid composition of the endosomal  
345 membrane or through the association with membranous co-factors, such as  
346 ZMPSTE24 and IFITM interactions (34, 50). It has previously been demonstrated that  
347 the antiviral effect of IFITM2 and IFITM3 on infection by susceptible viruses such as  
348 IAV, can be attenuated in the presence of the amphiphilic antifungal drug amphotericin  
349 B (AmphoB) (50, 51). AmphoB intercalates into endosomal membranes and indirectly  
350 abrogates IFITM-mediated restriction through enhancement of membrane fluidity (51).  
351 We therefore used AmphoB treatment to analyse whether membrane modulation is  
352 required for ZMPSTE24 restriction and for the cooperative antiviral activity of  
353 ZMPSTE24 and IFITM proteins. To address this, we used CRISPR-Cas9 ZMPSTE24  
354 KO A549 cells that overexpressed either ZMPSTE24 or IFITM3 individually, or  
355 overexpressed both proteins in combination (Fig S2, Fig 6A). We infected these cells  
356 and CRISPR-Cas9 NT control cells with our panel of arenavirus GPpp namely LCMV,  
357 LASV, MOPV, LUJV, JUNV, MACV and CHAPV. Notably, AmphoB had no effect on  
358 arenavirus GPpp infection in NT controls. We observed that AmphoB produced a  
359 broadly significant reversal of ZMPSTE24-mediated restriction of arenavirus GPpp  
360 infection, rendering these cells less sensitive to ZMPSTE24 inhibition (Fig 6A).  
361 Furthermore, AmphoB limited the cooperative restriction of ZMPSTE24 and IFITM3 in  
362 comparison to untreated cells (Fig 6A). These data imply that at the early stages of  
363 arenavirus infection, the modulation of cellular membrane integrity is critical for the  
364 antiviral activity of ZMPSTE24 and the observed restriction enhancement in the  
365 presence of IFITM3. To examine this during live virus infection, we infected these cells  
366 with MOPV at MOI 0.01 for 72 hrs and quantified levels of MOPV L and NP gene  
367 expression. We found that AmphoB increased the sensitivity of MOPV to ZMSPT24  
368 alone and when expressed in combination with IFITM3 (Fig 6B). Similar to arenavirus

369 GPpp infection (Fig 6A), expression of IFITM3 alone did not affect MOPV replication.  
 370 Furthermore, we also observed no change in MOPV L and NP gene expression levels  
 371 upon AmphoB treatment in these cells.

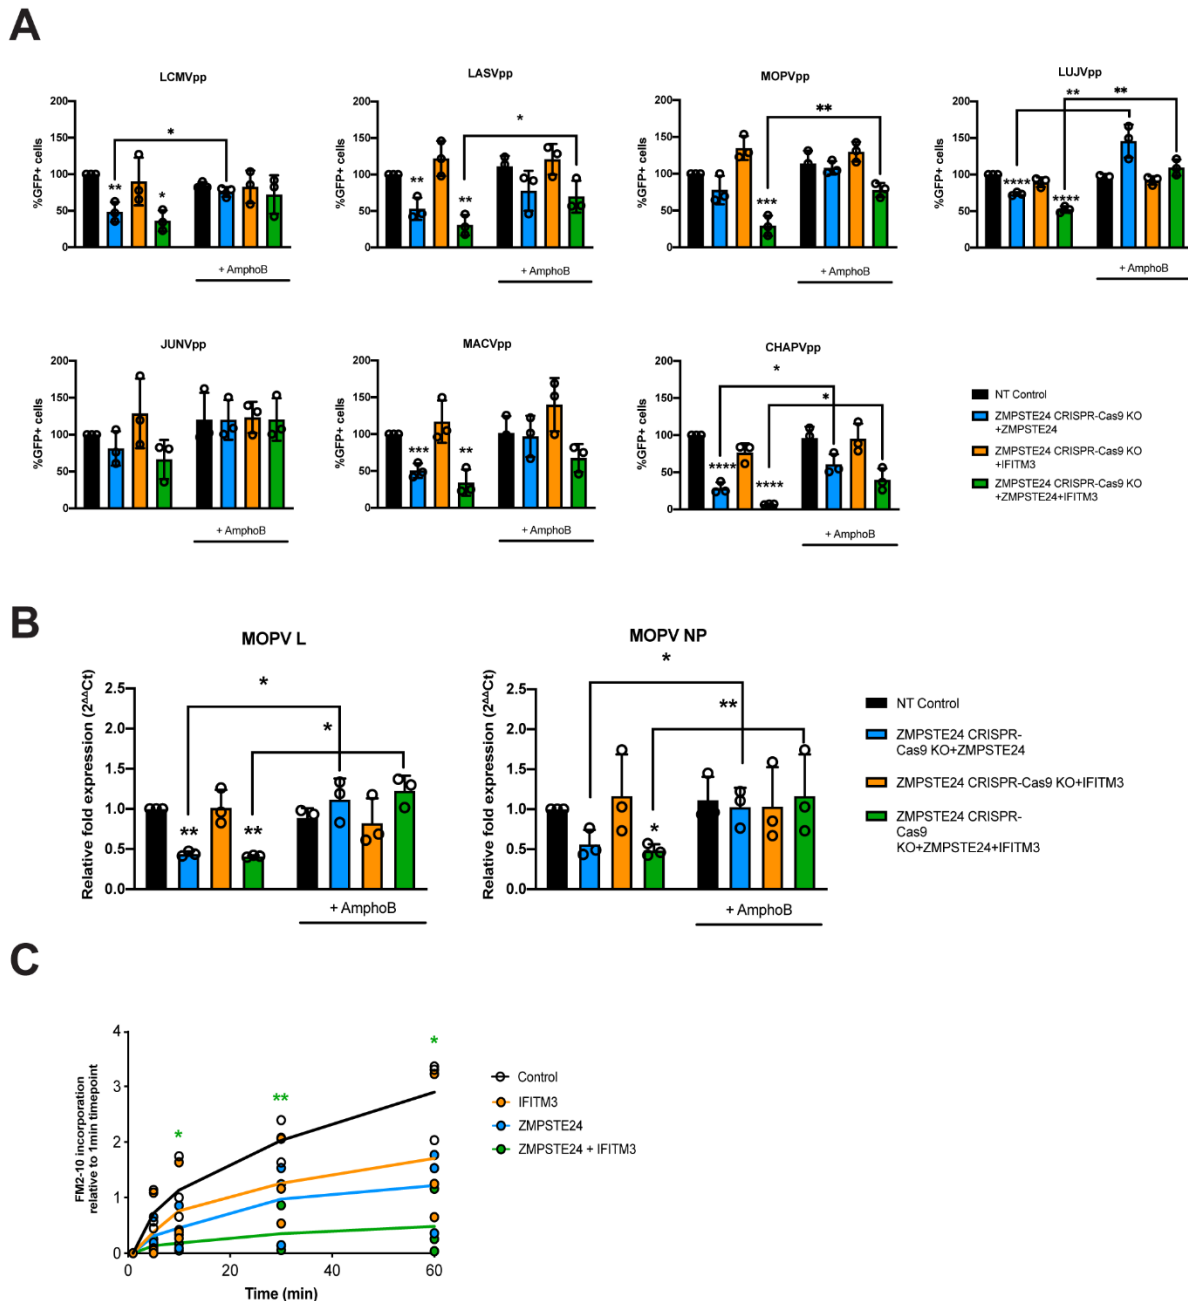

**Fig 6. ZMPSTE24 and IFITM3 modulate membrane fluidity to restrict arenaviruses.** A549 CRISPR-Cas9 stable knock out cell lines generated in Fig 4 for non-targeting (NT) control or ZMPSTE24 and then transduced for stable overexpression of ZMPSTE24-FLAG or IFITM3 or both were incubated with 1 $\mu$ M Amphotericin B (AmphoB) for 1 h prior to infection with **(A)** the panel of arenavirus GP-pseudoparticles (GPpp) for LCMV, LASV,

MOPV, LUJV, JUNV, MACV and CHAPV for 48 h or with **(B)** MOPV (MOI 0.01) for 72 h. Infectivity of GPpp was measured by flow cytometry and calculated as percentage GFP-positive cells compared to control. Unpaired t-test \*\*\*\* $p < 0.0001$ , \*\*\*  $p < 0.001$ , \*\*  $p < 0.01$ , \* $p < 0.05$ . MOPV L and NP gene expression was analysed by RT-qPCR and the  $2^{\Delta\Delta Ct}$  method with housekeeping genes  $\beta$ -actin and GAPDH and is displayed as relative fold change in relation to untreated NT control cells. **(C)** A549 cells stably expressing ZMPSTE24, IFITM3 or both were incubated with 200nM FM<sup>TM</sup>2-10 for the indicated time points and FM<sup>TM</sup>2-10 incorporation was measured as fluorescence intensity of incorporated membrane probe by flow cytometry. All data are expressed as means  $\pm$ SEM from experiments performed in triplicate. Unpaired t-test \*\*  $p < 0.01$ , \* $p < 0.05$

372 Structural changes in host cell membranes that can affect, for example, membrane  
373 fluidity or surface tension have implications for a wide range of biological mechanisms  
374 including cell division, endocytosis and viral fusion (50-52). Given that ZMPSTE24 and  
375 IFITMs act both independently and in synergy against a plethora of virus families, it is  
376 highly likely that they share a common mechanism that impacts on the host cellular  
377 environment. To investigate the impact of ZMPSTE24 on host membranes and indeed  
378 co-expression of the two proteins, we assessed the rate of cellular internalisation of  
379 the non-toxic membrane probe FM<sup>TM</sup>2-10 in A549 cells overexpressing ZMPSTE24,  
380 IFITM3 or ZMPSTE24 and IFITM3 in combination. FM<sup>TM</sup>2-10 reversibly binds to the  
381 outer leaflet of the cell membrane and upon endocytosis localises to the membrane of  
382 the endocytic vesicle (53). The fluorescence emission of FM<sup>TM</sup>2-10 increases with  
383 membrane incorporation, thus we measured the changes in FM<sup>TM</sup>2-10 fluorescence  
384 intensity over time by flow cytometry to determine the kinetics of membrane  
385 internalisation. In contrast to control cells, the rate and intensity of FM<sup>TM</sup>2-10 probe  
386 incorporation, characteristic of membrane endocytosis, was reduced in the presence  
387 of IFITM3 or ZMPSTE24 and this reduction was significantly enhanced upon co-  
388 expression of the two restriction factors (Fig 6C). These findings strengthen the



389 argument that ZMPSTE24 and IFITMs cause changes in membrane structure and  
390 dynamics that likely impact on the efficiency of virus fusion.

391 Thus, ZMPSTE24-mediated restriction activity is involved in the early stages of the  
392 innate immune response to arenavirus infection and IFITMs are able to enhance  
393 effects on membrane fluidity and thus inhibition of virus infection.

394

## 395 **Discussion**

396 The entry and fusion of viruses into susceptible host cells represents a fundamental  
397 step of viral pathogenesis and is a central factor in disease outcome. Investigations  
398 into the molecular and cellular mechanisms that drive cell invasion of arenaviruses  
399 have unravelled complex details surrounding receptor switching, the regulation of virus  
400 endocytosis and the conformational rearrangements within the GP structure that  
401 induce membrane fusion during entry (27, 54). However, there is still limited  
402 knowledge regarding the range of antiviral proteins that limit the entry of arenaviruses  
403 and how the activity of these proteins may be modulated by virus-specific proteins.

404 In this study, we identified ZMPSTE24 as an intrinsic restriction factor against  
405 arenavirus entry and replication. The antiviral impact of ZMPSTE24 on arenavirus  
406 infection was shown by demonstrating that arenavirus GPpp infection and MOPV  
407 replication are enhanced in cells with depleted ZMPSTE24 and that ectopic  
408 expression of ZMPSTE24 caused a reduction in arenavirus GPpp and MOPV  
409 infection. Recent studies have indicated a number of enveloped viruses that traffic  
410 through the cellular endosomal compartment during entry are restricted by ZMPSTE24  
411 (33). Our findings now expand this list to include arenaviruses. The breadth of viruses  
412 impacted by ZMPSTE24 activity suggests a universal antiviral mechanism that occurs  
413 prior to virus fusion. Our data suggests that disrupting the protease activity of

414 ZMPSTE24 does not alter the sensitivity of arenaviruses to restriction, further implying  
415 a generalised mechanism of restriction that may involve modifying host cell membrane  
416 properties to inhibit fusion pore formation. This mechanism which impairs endosomal  
417 viral membrane fusion is likely facilitated by the IFITM proteins as co-factors of  
418 ZMPSTE24 activity.

419 The localisation of IFITM proteins is an important determinant of the breadth of viruses  
420 that they restrict. IFITM1 is found predominantly at the plasma membrane whilst  
421 IFITMs 2 and 3 localise to endosomal compartments (21). We confirmed and  
422 expanded previous studies that show arenaviruses are insensitive to IFITM restriction  
423 (39). However, our observations also highlight that arenavirus entry and replication is  
424 enhanced upon knock down and knockout of IFITM expression. This implies that  
425 IFITMs are involved as antiviral factors against the early stages of arenavirus infection.  
426 A recent study by Suddala *et al.* (39) indicated that IFITM3 restricts through a  
427 proximity-based mechanism and that LASV may escape restriction by IFITM3 by  
428 entering cells through a distinct endosomal pathway lacking IFITM3 expression. Our  
429 observations support that arenaviruses are not inherently insensitive to IFITM  
430 restriction given that IFITM depletion enhances arenavirus infection (39).

431 In light of our findings and given that previous studies have showed that ZMPSTE24  
432 is required for the antiviral activity of IFITMs, we explored a possible cooperative role  
433 of ZMPSTE24 and IFITMs against arenavirus infection. Our data demonstrate that  
434 endogenous ZMPSTE24 co-localises with all three IFITM proteins when they are  
435 ectopically expressed in A549 cells. Using immunoprecipitation and complementation  
436 assays, we also showed that IFITM proteins interact with ZMPSTE24.

437 In our present study, we provide strong evidence for the biological significance of the  
438 ZMPSTE24—IFITM interaction demonstrating that engagement with IFITM proteins

439 enhances the sensitivity of arenaviruses to ZMPSTE24-mediated restriction.  
440 Specifically, we show that stable ectopic expression of ZMPSTE24 with IFITM3  
441 significantly enhanced inhibition of arenavirus entry and replication. In addition, we  
442 found that in contrast to cells singly overexpressing IFITM3, ectopic co-expression of  
443 IFITM3 with ZMPSTE24 in A549 cells led to the redistribution of IFITM3 to distinct  
444 endosomal compartments that were positive for ZMPSTE24. We therefore propose  
445 the redistribution of IFITM3 to a ZMPSTE24-positive pathway along which  
446 arenaviruses enter and fuse, induces an enhanced modification of cellular membranes  
447 that thus impairs virus fusion. Supporting this hypothesis, we provide evidence that  
448 the absence of IFITMs in A549 cells expressing ZMPSTE24 leads to a reduction in  
449 the sensitivity of arenavirus GPpp to ZMPSTE24-mediated restriction. It is therefore  
450 tempting to speculate that ZMPSTE24 is able to modulate the intracellular trafficking  
451 of its IFITM co-factors to an early endosomal localisation that increases the  
452 susceptibility of normally IFITM-resistant viruses like arenaviruses.

453 We aimed to address the mechanism of ZMPSTE24 restriction and of the observed  
454 cooperative activity using AmphoB treatment which disrupts IFITM function and by  
455 assessing the incorporation of a membrane-sensitive probe, FM<sup>TM</sup>2-10. Pre-treatment  
456 with AmphoB rescued the entry and fusion of arenavirus GPpp and live MOPV  
457 infection in cells expressing either ZMPSTE24 alone or co-expressing ZMPSTE24 and  
458 IFITM3. These findings are consistent with the notion that ZMPSTE24 may exert its  
459 inhibitory effect by modulating the curvature and increasing the rigidity of endosomal  
460 membranes, much like the IFITM proteins. Interestingly, ZMPSTE24 decreased the  
461 rate and intensity of FM<sup>TM</sup>2-10 incorporation into cellular membranes and this was  
462 further abrogated in the presence of IFITM3. Given the effects that these proteins likely  
463 have on membrane fluidity, the decreased incorporation and thus the associated

464 reduced rate of endocytosis may be an indirect effect of changes in lipid composition  
465 and the distribution of membrane components. It also provides evidence that both  
466 ZMPSTE24 and IFITM3 exert their antiviral function by increasing membrane order  
467 and rigidity, a mechanism consistent with that proposed by previous studies on IFITM3  
468 alone (49, 51).

469 In summary, our study highlights a previously unexplored restriction factor strategy  
470 that contributes to our understanding of arenavirus entry mechanisms. It provides  
471 further insight into the activities of ZMPSTE24 and IFITMs and provides the  
472 opportunity to target and augment this restriction mechanism for antiviral  
473 development. Defining the critical interaction sites between ZMPSTE24 and IFITM  
474 proteins and understanding the role of arenaviral proteins in abrogating restriction is  
475 of importance.

476

## 477 **Materials and methods**

### 478 **Cell lines and expression constructs.**

479 Human embryonic kidney 293T (293T; ATCC), kidney epithelial Vero (Vero; ATCC),  
480 human lung adenocarcinoma epithelial (A549; ATCC) and A549 cells expressing  
481 ZMPSTE24 or the individual IFITM proteins were cultured in Dulbecco's Modified  
482 Eagle Medium (DMEM), high glucose, GlutaMAX™ Supplement (Gibco) with 10%  
483 heat inactivated FBS (Gibco) and 200 µg/ml Gentamicin (Sigma) at 37°C, 5% CO<sub>2</sub>.

484 Expression plasmids encoding for human ZMPSTE24 with and without a C-terminal  
485 FLAG-tag or HA-tag were PCR amplified and subcloned into the pQXCIP (Clontech)  
486 backbone using flanking restriction sites *AgeI* and *BamHI*. Human IFITM1, IFITM2 and  
487 IFITM3 were cloned into the pLHCX retroviral vector (Clontech) using *XhoI* and *NotI*  
488 restriction sites. All IFITM proteins were HA-tagged by PCR-based mutagenesis using  
489 the parental pLHCX-IFITM1, 2 or 3 as templates.

490 Arenavirus glycoproteins for LCMV, LASV, MOPV, LUJV, JUNV, MACV and CHAPV  
491 (accession numbers M22138, M15076, M33879, FJ952384, D10072, AY624355, and  
492 EU260463, respectively) were synthesized by GeneArt (ThermoFisher) and  
493 subcloned into the pI.18 expression vector (kindly gifted by Professor Janet Daly)  
494 using *KpnI* and *XhoI* as flanking restriction sites.

495 A549 cells stably expressing the IFITMs 1, 2 or 3 (pLHCX) or ZMPSTE24 tagged with  
496 or without a C-terminal FLAG tag (pQXCIP) or the relevant empty vector, were  
497 generated by vesicular stomatitis virus-G (VSV-G) pseudotyped retroviral  
498 transduction. Retroviral vectors were made by transfecting 293T cells with the pCMV-  
499 Gag-Pol murine leukaemia virus (MLV) packaging construct (kindly gifted by Professor  
500 Jonathan Ball), the pLHCX or pQXCIP packaging vector of interest and pCMV VSV-

501 G using 1mg/ml PEI®-MAX (Polysciences). Media was replaced 16 h post-transfection  
502 and viral supernatants were harvested through a 0.45 µm filter, 48 h post transfection.  
503 A549 cells were incubated for 48 h with retroviral vectors following spinoculation at  
504 400 xg for 1 h to generate the stable cell lines. The corresponding antibiotic selection  
505 was added 48 h post-transfection. Expression of proteins was assessed by western  
506 blotting. When indicated, IFN-α (universal type 1 IFN, PBL Interferon Source)  
507 stimulation was performed using 1000 U ml<sup>-1</sup> for 4 h before immunoblotting.  
508 The NanoBiT split luciferase system was used to assess interaction of IFITM3 and  
509 ZMPSTE24. Briefly IFITM3 and ZMPSTE24 were fused to the NanoBiT large (LgBiT)  
510 or small (SmBiT) subunits of NanoLuc luciferase at the N or C terminus. The coding  
511 region of IFITM3 was amplified by PCR with added *XhoI* and *NheI* restriction sites  
512 whereas ZMPSTE24 was amplified with *BglII* and *XhoI* sites. Primers used were as  
513 follows: IFITM3 C-terminal forward (5'-  
514 ATGCATGCTAGCGCCACCATGAATCACACTGTCCAAAC-3'), IFITM3 C-terminal  
515 reverse (5'-ATGCATCTCGAGCCTCCATAGGCCTGGAAGA-3'), IFITM3 N-terminal  
516 forward (5'-ATGCATCTCGAGCGGTATGAATCACACTGTCCAA-3'), IFITM3 N-  
517 terminal reverse (5'-ATGCATGCTAGCCTATCCATAGGCCTGGA-3'), ZMPSTE24 C-  
518 terminal forward (5'-ATGCATAGATCTATGGGGATGTGGGCATCG-3'), ZMPSTE24  
519 C-terminal reverse (5'-ATGCATCTCGAGCCGTGTTGCTTCATAGTTTTTC-3'),  
520 ZMPSTE24 N-terminal forward (5'-  
521 ATGCATCTCGAGCGGTATGGGGATGTGGGCATC-3') and ZMPSTE24 N-terminal  
522 reverse (5'-ATGCATGCTAGCTCAGTGTTGCTTCATAGT-3'). Amplified fragments  
523 were digested with corresponding restriction enzymes and ligated into the following  
524 vectors: pBiT1.1-C [TK LgBiT], pBiT2.1-C [TK SmBiT], pBiT1.1-N [TK LgBiT] and  
525 pBiT2.1-N [TK SmBiT].

526 **Passage and titration of Mopeia virus (MOPV).**

527 The UVE/MOPV/UNK/MZ/Mozambique 20410 strain of MOPV was obtained from  
528 European Virus Archive and mycoplasma-free virus stocks were propagated in Vero  
529 cells in DMEM supplemented with 2% FCS. The titre of MOPV stocks was determined  
530 by focus forming assay. Vero cells were infected with serial dilutions of MOPV for 1 h  
531 at 37°C and then incubated in complete DMEM for 48 h. Infected foci were visualised  
532 using mouse monoclonal Anti-Arenavirus (OW) rGPC, Clone KL-AV-1B3 (BEI  
533 Resources, 1:200) followed by anti-mouse AlexaFluor488 secondary (Jackson  
534 ImmunoResearch; 1:1000). Virus titres were calculated as focus forming units per mL  
535 (FFU/mL) and MOI calculated for subsequent experiments.

536

537 **Infection with MOPV.**

538 A549 cells were infected for 1 h at 37°C with MOPV at an MOI 0.01. Media was then  
539 replaced and the cells incubated for a further 72 h at 37°C after which they were  
540 harvested for total RNA extraction. For interferon treatment, cells were treated with  
541 1000 U ml<sup>-1</sup> IFN-α (universal type 1 IFN, PBL Interferon Source) for 4 h before  
542 infection. Media was changed before infection with MOPV as above. To assess the  
543 effect of amphotericin B on the restriction of MOPV replication by ZMPSTE24 and the  
544 cooperative action with IFITMs, the relevant stable A549 cell lines were treated with 1  
545 μM amphotericin B (Sigma Aldrich) for 1 h at 37°C prior to infection and following  
546 infection with MOPV.

547

548 **Generation of arenavirus GP retroviral pseudoparticles.**

549 To produce arenavirus GP retroviral pseudoparticles, encoding GFP, 293T cells were  
550 transfected with pCMV-MLV gag-pol, the pCMV-MLV GFP encoding an MLV-based  
551 transfer vector containing a CMV-GFP internal transcriptional unit (kindly gifted by  
552 Professor Jonathan Ball) and the pl.18 plasmid encoding the arenavirus GP of interest,  
553 at a ratio of 0.6:0.9:0.6 µg. Cells were transfected using 1 mg/ml PEI MAX®  
554 (Polysciences). Media was replaced 16 h post-transfection and viral supernatants  
555 were harvested through a 0.45µm filter 48 h post transfection. The viral supernatants  
556 were then titrated on A549 cells by flow cytometry.

557

558 **Entry assay using arenavirus GP pseudoparticles**

559 Cells were infected with arenavirus GP retroviral pseudoparticles, encoding GFP at an  
560 MOI of 0.3 in complete growth media and incubated at 37°C for 48 h. Infected cells  
561 were analysed by flow cytometry. Samples were gated on live cells for 10,000 events  
562 and analysed for expression of GFP. To test the effect of IFN1 on arenavirus GP-  
563 mediated cell entry, cells were treated with IFN-α (universal type 1 IFN, PBL Interferon  
564 Source) for 4 h prior and throughout infection. To assess the effect of amphotericin B  
565 on the restriction of arenavirus entry by ZMPSTE24 and the co-operative action with  
566 IFITMs, relevant stable A549 cell lines were treated with 1 µM amphotericin B (Sigma  
567 Aldrich) for 1 h at 37°C prior to infection and following infection with arenavirus GP  
568 pseudoparticles.

569



570 **Flow cytometry**

571 Cells are gently washed, detached and resuspended in 1% BSA in PBS and 0.1%  
572 (w/v) sodium azide. Flow cytometry analyses were performed using a BD FACSCanto  
573 II flow-cytometer (Becton Dickinson), collecting 10,000 events, and analysed using  
574 FlowJo software. Arenavirus glycoprotein pseudotyped virus vector infected cells were  
575 analysed for expression of GFP. Infected cell gates were set using uninfected control  
576 samples. FM<sup>TM</sup>2-10 membrane probe incorporation was also measured by flow  
577 cytometry and cells gated on the PE channel and gates were set using non-treated  
578 control samples.

579

580 **siRNA knockdown of ZMPSTE24 and IFITMs**

581 siRNA mediated knockdown of ZMPSTE24 and IFITM proteins was performed by  
582 transfection of A549 cells using Lipofectamine<sup>TM</sup>RNAiMAX Transfection Reagent  
583 (ThermoFisher) according to the manufacturer's instructions. Cells were transfected  
584 with 10  $\mu$ M of either of the following SMARTpool siRNAs (Dharmacon): ON-  
585 TARGETplus Non-targeting Pool siRNA (D-001810-10-05) or ON-TARGETplus  
586 Human ZMPSTE24 (10269) siRNA (L-006104-00-0010) or ON-TARGETplus Human  
587 IFITM1 (8519) siRNA (L-019543-00-0005), ON-TARGETplus Human IFITM2 (10581)  
588 siRNA(L-020103-00-0005) or ON-TARGETplus Human IFITM3 (10410) siRNA (L-  
589 014116-01-0005). Knockdown was assessed by western blotting and cells used in  
590 functional assays 48 h post-transfection.

591

## 592 **CRISPR-Cas9 knockout of ZMPSTE24 and IFITM expression**

593 CRISPR-Cas9 gRNA sequences to target human ZMPSTE24  
594 (CACAAC TAATGTGAACAGCC) and a non-targeting control  
595 (GGCCCTCTAGAAAAGTCTCG) were generated in pLentiCRISPR v2 and gRNA  
596 sequences to target human IFITMs 1, 2 and 3 (TTCTTCTCTCCTGTCAACAG) were  
597 generated in eSpCas9-LentiCRISPR v2 (Genscript). Viral stocks were generated in  
598 293T cells. 293T cells were co-transfected with psPAX2 (Addgene), pMD2.G VSV-g  
599 and the eSpCas9-LentiCRISPRv2 construct targeting ZMPSTE24 or the IFITM  
600 proteins or a non-targeting control at a ratio of 0.6:0.9:0.6 using 1 mg/ml PEI<sup>®</sup>-MAX.  
601 Media was changed 16 h post transfection and viral stocks were harvested and filtered  
602 48 h post transfection. A549 cells were then transduced with the pLentiCRISPR  
603 viruses at 400 xg for 1 h and cells cultured for a further 7 days in the presence of 1  
604 µg/ml puromycin. The efficiency of knockout was determined by SDS-PAGE and  
605 western blot. The effects of CRISPR-Cas9 knockout of protein expression on  
606 arenavirus GP pseudoparticle entry and MOPV replication was determined by flow  
607 cytometry and by RT-qPCR assays.

608

## 609 **SDS-PAGE and Western blot analysis.**

610 Cellular samples were lysed in 2x reducing Laemmli buffer (Bio-Rad) at 100°C for 10  
611 min. Samples were separated on 8–16% Mini-PROTEAN<sup>®</sup> TGX Precast gels (Bio-  
612 Rad) and transferred onto 0.2 µm nitrocellulose membrane (Bio-Rad). Membranes  
613 were blocked in 5% milk in PBS with 0.1% Tween<sup>®</sup>20 (PBS-T) for 30 min prior to  
614 incubation with specific primary antibodies: mouse anti-IFITM1 (Proteintech, 60074-1-  
615 Ig, 1:5000), rabbit anti-IFITM2 (Proteintech, 12769-1-AP, 1:5000), rabbit anti-IFITM3  
616 (Proteintech, 11714-1-AP, 1:5000), rabbit anti-ZMPSTE24 antibody (Abcam ab38450,

617 1:1000), mouse anti-FLAG (Sigma, F1804, 1:2000), mouse anti-HA (Abcam ab18181,  
618 1:5000), mouse anti-HSP90 (Invitrogen, MA1-10372, 1:10,000). All antibodies were  
619 diluted in 5% milk in PBS-T and incubated at 4°C overnight with gentle shaking. After  
620 washing membranes with PBS-T at RT, horseradish peroxidase-conjugated (HRP)  
621 horse anti-mouse IgG (CST, 7076S, 1:5000) and goat anti-rabbit IgG (CST, 7074S,  
622 1:5000) secondary antibodies in 5% milk in PBS-T were added and membranes  
623 incubated for 1 h at RT with gentle shaking. Following washes in PBS-T, proteins were  
624 detected using SuperSignal™ West Pico PLUS Chemiluminescent Substrate  
625 (ThermoFisher).

626

#### 627 **Immunoprecipitations.**

628 A549 cells were transfected with 2 µg pQXCIP ZMPSTE24-FLAG. 48 h post  
629 transfection cells were lysed on ice for 20 min in 50 mM Tris-HCL pH 7.4, 150 mM  
630 NaCl, 1% IGEPAL®CA-630 (Sigma), complete protease inhibitors (Roche). Lysed  
631 samples were centrifuged and supernatants were immunoprecipitated with 5µg/ml  
632 mouse monoclonal anti-IFITM2/3 antibody (Proteintech, 66081-1-Ig) for 1.5 h at 4°C.  
633 Protein G agarose (ThermoFisher) was equilibrated in lysis buffer before adding to  
634 supernatants and incubated with gentle rolling overnight at 4°C. Following extensive  
635 washes in lysis buffer, cell lysates and immunoprecipitates on beads were  
636 resuspended in 2x Laemmli buffer (Bio-Rad) and subjected to SDS-PAGE and  
637 western blot analysis.

638

#### 639 **Immunofluorescence microscopy.**

640 A549 cells grown on coverslips and transiently transfected with HA-tagged IFITM or  
641 FLAG- or HA-tagged ZMPSTE24 proteins, were fixed with 4% paraformaldehyde

642 (PFA) in PBS for 10 mins at RT. Cells were permeabilized with 0.1% Triton X-100 in  
643 PBS for 10 min at RT and stained overnight at 4°C with the appropriate primary  
644 antibodies (rabbit anti-ZMPSTE24, Abcam ab38450, 1:100 or mouse monoclonal anti-  
645 HA, Abcam ab18181, 1:500 or rabbit anti-EEA1, CST 2411S, 1:100 or rabbit anti-  
646 Rab9A, CST 5118T, 1:200, or rabbit anti-LAMP1, Invitrogen 14-1079-80, 1:500. All  
647 antibodies were diluted in 0.1% BSA, 0.01% Triton-X-100 in PBS. Following washes  
648 in PBS, coverslips were incubated for 1 h at RT with appropriate secondary antibodies  
649 conjugated to Alexa Fluor 488 or 594 (Molecular Probes, ThermoFisher 1:500) diluted  
650 in 0.1% BSA, 0.01% Triton-X-100 in PBS. Following incubation, coverslips were  
651 washed in PBS and mounted on glass slides using ProLong™ Diamond Antifade  
652 Mountant with DAPI (Molecular Probes, ThermoFisher). Images were acquired on a  
653 Zeiss LSM880 confocal laser scanning microscope or on a Leica DM5000 B widefield  
654 microscope. Z stacks were taken for all stained conditions and images were  
655 deconvolved with the Zeiss ZEN deconvolution software and analysed using ImageJ.  
656 Representative images are shown.

657

#### 658 **NanoBiT protein interaction assay.**

659 A NanoBiT protein:protein interaction assay (Promega) was used to assess the  
660 interaction between ZMPSTE24 and IFITM3. A549 cells were transiently co-  
661 transfected with 100 ng in total of an N- or C-terminal LgBiT and SmBiT tagged  
662 construct using Lipofectamine™ 3000 Transfection Reagent (ThermoFisher). All  
663 possible combinations of the N-terminal and C-terminal-tagged split luciferase protein  
664 pairs were tested. All LgBiT constructs were co-transfected with the HaloTag-SmBiT  
665 (negative control) construct against which relative luminescence was measured.

666 Luminescence was measured after 48 h using the Nano-Glo<sup>®</sup> Live Cell Assay System  
667 (Promega) according to manufacturer's instructions.

668

### 669 **RT-qPCR analysis.**

670 Nucleoprotein (NP) and RNA-dependent RNA polymerase (L) RNA levels were  
671 determined in cells infected with MOPV after 72 h of infection. Total RNA was isolated  
672 from infected cells using the QIAGEN RNeasy Plus Mini Kit (Qiagen, 74136) and  
673 cDNA was reverse transcribed using the Applied Biosystems<sup>™</sup> High-Capacity cDNA  
674 Reverse Transcription Kit according to manufacturer's instructions. For each qPCR  
675 reaction, 10ng of cDNA was used with the Applied Biosystems<sup>™</sup> PowerUp<sup>™</sup> SYBR<sup>™</sup>  
676 Green Master Mix under the following conditions: 50°C 2 mins, 95°C 2 mins then 40  
677 cycles of 95°C 15 secs, 55°C 15 secs, 72°C 1 min. Primers used were as follows:  
678 GAPDH forward (5'-ACATCGCTCAGACACCATG-3'); GAPDH reverse (5'-  
679 TGTAGTTGAGGTCAATGAAGGG-3');  $\beta$ -actin forward (5'-  
680 CACCAACTGGGACGACAT-3');  $\beta$ -actin reverse (5'-ACAGCCTGGATAGCAACG-3');  
681 MOPV L forward (5'-ATCTCCTCATGCAGCCACAC-3'); MOPV L reverse (5'-  
682 GGACTGTTGGAGAGTTGCGA-3'); MOPV NP forward (5'-  
683 CCCTGGCATGTCAAGACCAT-3'); MOPV NP reverse (5'-  
684 CCCTGTGGAAGTTGCGATCT-3'). Primer specificity was confirmed by melt curve  
685 analysis. Relative fold expression of target genes was normalised to reference genes  
686 GAPDH and  $\beta$ -actin by the  $\Delta\Delta$ Ct method.

687

### 688 **FM<sup>™</sup>2-10 incorporation assay**

689 The effect of ZMPSTE24 and IFITM3 expression on the rate of internalisation of the  
690 FM<sup>™</sup>2-10 (N-(3-Triethylammoniumpropyl)-4-(4-(Diethylamino)styryl)Pyridinium

691 Dibromide, ThermoFisher) membrane probe into A549 cells was determined by flow  
692 cytometry. The detection of FM™2-10 fluorescence intensity as a function of time was  
693 used a measure of endocytosis. A549 cells stably expressing ZMPSTE24, or IFITM3  
694 or ZMPSTE24 and IFITM3 in combination or pQXCIP empty vector were washed and  
695 resuspended in PBS. A 2 µM stock solution of FM™2-10 was prepared in PBS before  
696 adding cells to a final concentration of 200 nM and incubating for 5, 10, 30 and 60min  
697 time points. The changes in FM™2-10 fluorescence intensity over time were detected  
698 by flow cytometry for each cell condition analysed.

699

#### 700 **Statistical analysis.**

701 All statistical analyses were carried out using GraphPad Prism v9.0.2. Levels of  
702 significance were determined as follows: \*\*\*\*p<0.0001, \*\*\* p<0.001, \*\* p<0.01,  
703 \*p<0.05. Data was subjected to independent sample t-tests.

704

#### 705 **Acknowledgements**

706 We are grateful to Professor Janet Daly for support and helpful advice. We thank  
707 Professor Jonathan Ball for helpful discussions. We are also grateful to Dr Thomas  
708 Strecker for advice and helpful suggestions. We thank Sam Stafford at Leeds Beckett  
709 University for his help with deconvolution of microscopy images. We also thank the  
710 members of the School of Veterinary Medicine and Science, University of Nottingham  
711 for their collegiate nature during a challenging year.

712 This research was supported by a Wellcome Trust Seed Award in Science  
713 217414/Z/19/Z and Nottingham Research Fellowship to TLF.

714 All experiments were planned and performed by RJS and TLF. Confocal microscopy  
715 was carried out by the University of Nottingham, School of Life Sciences Imaging Unit  
716 (SLIM). RJS and TLF analysed the data. RJS and TLF wrote the manuscript. All  
717 authors edited the manuscript and provided comments.

## 718 **References**

- 719 1. McLay L, Liang Y, Ly H. 2014. Comparative analysis of disease pathogenesis  
720 and molecular mechanisms of New World and Old World arenavirus infections.  
721 *J Gen Virol* 95:1-15.
- 722 2. Wolff H, Lange JV, Webb PA. 1978. Interrelationships among arenaviruses  
723 measured by indirect immunofluorescence. *Intervirology* 9:344-50.
- 724 3. Bowen MD, Peters CJ, Nichol ST. 1996. The Phylogeny of New World  
725 (Tacaribe Complex) Arenaviruses. *Virology* 219:285-290.
- 726 4. Clegg JC. 2002. Molecular phylogeny of the arenaviruses. *Curr Top Microbiol*  
727 *Immunol* 262:1-24.
- 728 5. Briese T, Paweska JT, McMullan LK, Hutchison SK, Street C, Palacios G,  
729 Khristova ML, Weyer J, Swanepoel R, Egholm M, Nichol ST, Lipkin WI. 2009.  
730 Genetic detection and characterization of Lujo virus, a new hemorrhagic fever-  
731 associated arenavirus from southern Africa. *PLoS Pathog* 5:e1000455.
- 732 6. Ilori EA, Furuse Y, Ipadeola OB, Dan-Nwafor CC, Abubakar A, Womi-Eteng  
733 OE, Ogbaini-Emovon E, Okogbenin S, Unigwe U, Ogah E, Ayodeji O, Abejegah  
734 C, Liasu AA, Musa EO, Woldetsadik SF, Lasuba CLP, Alemu W, Ihekweazu C.  
735 2019. Epidemiologic and Clinical Features of Lassa Fever Outbreak in Nigeria,  
736 January 1-May 6, 2018. *Emerg Infect Dis* 25:1066-1074.
- 737 7. Kafetzopoulou LE, Pullan ST, Lemey P, Suchard MA, Ehichioya DU, Pahlmann  
738 M, Thielebein A, Hinzmann J, Oestereich L, Wozniak DM, Efthymiadis K,  
739 Schachten D, Koenig F, Matjeschek J, Lorenzen S, Lumley S, Ighodalo Y,  
740 Adomeh DI, Olorokor T, Omomoh E, Omiunu R, Agbukor J, Ebo B, Aiyepada J,  
741 Ebhodaghe P, Osiemi B, Ehikhametalor S, Akhilomen P, Airende M, Esumeh

- 742 R, Muoebonam E, Giwa R, Ekanem A, Igenegbale G, Odigie G, Okonofua G,  
743 Enigbe R, Oyakhilome J, Yerumoh EO, Odia I, Aire C, Okonofua M, Atafu R,  
744 Tobin E, Asogun D, Akpede N, Okokhere PO, Rafiu MO, Iraoyah KO, Iruolagbe  
745 CO, et al. 2019. Metagenomic sequencing at the epicenter of the Nigeria 2018  
746 Lassa fever outbreak. *Science* 363:74-77.
- 747 8. Oloniniyi OK, Unigwe US, Okada S, Kimura M, Koyano S, Miyazaki Y, Iroezindu  
748 MO, Ajayi NA, Chukwubike CM, Chika-Igwenyi NM, Ndu AC, Nwidi DU, Abe H,  
749 Urata S, Kurosaki Y, Yasuda J. 2018. Genetic characterization of Lassa virus  
750 strains isolated from 2012 to 2016 in southeastern Nigeria. *PLoS Negl Trop Dis*  
751 12:e0006971.
- 752 9. Siddle KJ, Eromon P, Barnes KG, Mehta S, Oguzie JU, Odia I, Schaffner SF,  
753 Winnicki SM, Shah RR, Qu J, Wohl S, Brehio P, Iruolagbe C, Aiyepada J,  
754 Uyigüe E, Akhilomen P, Okonofua G, Ye S, Kayode T, Ajogbasile F, Uwanibe  
755 J, Gaye A, Momoh M, Chak B, Kotliar D, Carter A, Gladden-Young A, Freije  
756 CA, Omoregie O, Osiemi B, Muoebonam EB, Airende M, Enigbe R, Ebo B,  
757 Nosamiefan I, Oluniyi P, Nekoui M, Ogbaini-Emovon E, Garry RF, Andersen  
758 KG, Park DJ, Yozwiak NL, Akpede G, Ihekweazu C, Tomori O, Okogbenin S,  
759 Folarin OA, Okokhere PO, MacInnis BL, Sabeti PC, et al. 2018. Genomic  
760 Analysis of Lassa Virus during an Increase in Cases in Nigeria in 2018. *N Engl*  
761 *J Med* 379:1745-1753.
- 762 10. Asogun DA, Günther S, Akpede GO, Ihekweazu C, Zumla A. 2019. Lassa  
763 Fever: Epidemiology, Clinical Features, Diagnosis, Management and  
764 Prevention. *Infect Dis Clin North Am* 33:933-951.
- 765 11. Control NCfD. 2021. Lassa fever Situation Report Epi Week 10: 8 – 14 March  
766 2021, p 5,  
767 [https://ncdc.gov.ng/diseases/sitreps/?cat=5&name=An%20update%20of](https://ncdc.gov.ng/diseases/sitreps/?cat=5&name=An%20update%20of%20Lassa%20fever%20outbreak%20in%20Nigeria)  
768 [%20Lassa%20fever%20outbreak%20in%20Nigeria](https://ncdc.gov.ng/diseases/sitreps/?cat=5&name=An%20update%20of%20Lassa%20fever%20outbreak%20in%20Nigeria).
- 769 12. Kofman A, Choi M, Rollin P. 2019. Lassa Fever in Travelers from West Africa,  
770 1969–2016. *Emerging Infectious Disease journal* 25:236.



- 771 13. Overbosch F, de Boer M, Veldkamp KE, Ellerbroek P, Bleeker-Rovers CP,  
772 Goorhuis B, van Vugt M, van der Eijk A, Leenstra T, Khargi M, Ros J,  
773 Brandwagt D, Haverkate M, Swaan C, Reusken C, Timen A, Koopmans M, van  
774 Dissel J. 2020. Public health response to two imported, epidemiologically  
775 related cases of Lassa fever in the Netherlands (ex Sierra Leone), November  
776 2019. *Euro Surveill* 25.
- 777 14. Whitmer SLM, Strecker T, Cadar D, Dienes HP, Faber K, Patel K, Brown SM,  
778 Davis WG, Klena JD, Rollin PE, Schmidt-Chanasit J, Fichet-Calvet E, Noack B,  
779 Emmerich P, Rieger T, Wolff S, Fehling SK, Eickmann M, Mengel JP, Schultze  
780 T, Hain T, Ampofo W, Bonney K, Aryeequaye JND, Ribner B, Varkey JB, Mehta  
781 AK, Lyon GM, 3rd, Kann G, De Leuw P, Schuettfort G, Stephan C, Wieland U,  
782 Fries JWU, Kochanek M, Kraft CS, Wolf T, Nichol ST, Becker S, Ströher U,  
783 Günther S. 2018. New Lineage of Lassa Virus, Togo, 2016. *Emerg Infect Dis*  
784 24:599-602.
- 785 15. Wolff S, Schultze T, Fehling SK, Mengel JP, Kann G, Wolf T, Eickmann M,  
786 Becker S, Hain T, Strecker T. 2016. Genome Sequence of Lassa Virus Isolated  
787 from the First Domestically Acquired Case in Germany. *Genome Announc* 4.
- 788 16. Carnec X, Mateo M, Page A, Reynard S, Hortion J, Picard C, Yekwa E, Barrot  
789 L, Barron S, Vallve A, Raoul H, Carbonnelle C, Ferron F, Baize S. 2018. A  
790 Vaccine Platform against Arenaviruses Based on a Recombinant  
791 Hyperattenuated Mopeia Virus Expressing Heterologous Glycoproteins. *J Virol*  
792 92.
- 793 17. Kiley MP, Lange JV, Johnson KM. 1979. Protection of rhesus monkeys from  
794 Lassa virus by immunisation with closely related Arenavirus. *Lancet* 2:738.
- 795 18. Walker DH, Johnson KM, Lange JV, Gardner JJ, Kiley MP, McCormick JB.  
796 1982. Experimental infection of rhesus monkeys with Lassa virus and a closely  
797 related arenavirus, Mozambique virus. *J Infect Dis* 146:360-8.
- 798 19. Mazzola LT, Kelly-Cirino C. 2019. Diagnostics for Lassa fever virus: a  
799 genetically diverse pathogen found in low-resource settings. *BMJ Global Health*  
800 4:e001116.

- 801 20. Bieniasz PD. 2004. Intrinsic immunity: a front-line defense against viral attack.  
802 Nature Immunology 5:1109-1115.
- 803 21. Foster TL, Wilson H, Iyer SS, Coss K, Doores K, Smith S, Kellam P, Finzi A,  
804 Borrow P, Hahn BH, Neil SJD. 2016. Resistance of Transmitted Founder HIV-  
805 1 to IFITM-Mediated Restriction. Cell Host Microbe 20:429-442.
- 806 22. Shi G, Kenney AD, Kudryashova E, Zani A, Zhang L, Lai KK, Hall-Stoodley L,  
807 Robinson RT, Kudryashov DS, Compton AA, Yount JS. 2021. Opposing  
808 activities of IFITM proteins in SARS-CoV-2 infection. Embo j 40:e106501.
- 809 23. Shi G, Schwartz O, Compton AA. 2017. More than meets the I: the diverse  
810 antiviral and cellular functions of interferon-induced transmembrane proteins.  
811 Retrovirology 14:53.
- 812 24. Winstone H, Lista MJ, Reid AC, Bouton C, Pickering S, Galao RP, Kerridge C,  
813 Doores KJ, Swanson C, Neil S. 2021. The polybasic cleavage site in the SARS-  
814 CoV-2 spike modulates viral sensitivity to Type I interferon and IFITM2. J Virol  
815 doi:10.1128/jvi.02422-20.
- 816 25. Abraham J, Kwong JA, Albariño CG, Lu JG, Radoshitzky SR, Salazar-Bravo J,  
817 Farzan M, Spiropoulou CF, Choe H. 2009. Host-Species Transferrin Receptor  
818 1 Orthologs Are Cellular Receptors for Nonpathogenic New World Clade B  
819 Arenaviruses. PLOS Pathogens 5:e1000358.
- 820 26. Jae LT, Raaben M, Herbert AS, Kuehne AI, Wirchnianski AS, Soh TK, Stubbs  
821 SH, Janssen H, Damme M, Saftig P, Whelan SP, Dye JM, Brummelkamp TR.  
822 2014. Virus entry. Lassa virus entry requires a trigger-induced receptor switch.  
823 Science 344:1506-10.
- 824 27. Li S, Sun Z, Pryce R, Parsy M-L, Fehling SK, Schlie K, Siebert CA, Garten W,  
825 Bowden TA, Strecker T, Huisken JT. 2016. Acidic pH-Induced  
826 Conformations and LAMP1 Binding of the Lassa Virus Glycoprotein Spike.  
827 PLoS pathogens 12:e1005418-e1005418.

- 828 28. Raaben M, Jae LT, Herbert AS, Kuehne AI, Stubbs SH, Chou YY, Blumen VA,  
829 Kirchhausen T, Dye JM, Brummelkamp TR, Whelan SP. 2017. NRP2 and CD63  
830 Are Host Factors for Lujo Virus Cell Entry. *Cell Host Microbe* 22:688-696.e5.
- 831 29. Bulow U, Govindan R, Munro JB. 2020. Acidic pH Triggers Lipid Mixing  
832 Mediated by Lassa Virus GP. *Viruses* 12.
- 833 30. Di Simone C, Buchmeier MJ. 1995. Kinetics and pH dependence of acid-  
834 induced structural changes in the lymphocytic choriomeningitis virus  
835 glycoprotein complex. *Virology* 209:3-9.
- 836 31. Chemudupati M, Kenney AD, Bonifati S, Zani A, McMichael TM, Wu L, Yount  
837 JS. 2019. From APOBEC to ZAP: Diverse mechanisms used by cellular  
838 restriction factors to inhibit virus infections. *Biochimica et Biophysica Acta*  
839 (BBA) - Molecular Cell Research 1866:382-394.
- 840 32. Stott RJ, Strecker T, Foster TL. 2020. Distinct Molecular Mechanisms of Host  
841 Immune Response Modulation by Arenavirus NP and Z Proteins. *Viruses* 12.
- 842 33. Fu B, Wang L, Li S, Dorf ME. 2017. ZMPSTE24 defends against influenza and  
843 other pathogenic viruses. *Journal of Experimental Medicine* 214:919-929.
- 844 34. Li S, Fu B, Wang L, Dorf ME. 2017. ZMPSTE24 Is Downstream Effector of  
845 Interferon-Induced Transmembrane Antiviral Activity. *DNA Cell Biol* 36:513-  
846 517.
- 847 35. Brass AL, Huang IC, Benita Y, John SP, Krishnan MN, Feeley EM, Ryan BJ,  
848 Weyer JL, van der Weyden L, Fikrig E, Adams DJ, Xavier RJ, Farzan M,  
849 Elledge SJ. 2009. The IFITM Proteins Mediate Cellular Resistance to Influenza  
850 A H1N1 Virus, West Nile Virus, and Dengue Virus. *Cell* 139:1243-1254.
- 851 36. Desai TM, Marin M, Chin CR, Savidis G, Brass AL, Melikyan GB. 2014. IFITM3  
852 restricts influenza A virus entry by blocking the formation of fusion pores  
853 following virus-endosome hemifusion. *PLoS Pathog* 10:e1004048.
- 854 37. Everitt AR, Clare S, McDonald JU, Kane L, Harcourt K, Ahras M, Lall A, Hale  
855 C, Rodgers A, Young DB, Haque A, Billker O, Tregoning JS, Dougan G, Kellam

- 856 P. 2013. Defining the Range of Pathogens Susceptible to Ifitm3 Restriction  
857 Using a Knockout Mouse Model. PLOS ONE 8:e80723.
- 858 38. Mudhasani R, Tran JP, Retterer C, Radoshitzky SR, Kota KP, Altamura LA,  
859 Smith JM, Packard BZ, Kuhn JH, Costantino J, Garrison AR, Schmaljohn CS,  
860 Huang IC, Farzan M, Bavari S. 2013. IFITM-2 and IFITM-3 but not IFITM-1  
861 restrict Rift Valley fever virus. J Virol 87:8451-64.
- 862 39. Suddala KC, Lee CC, Meraner P, Marin M, Markosyan RM, Desai TM, Cohen  
863 FS, Brass AL, Melikyan GB. 2019. Interferon-induced transmembrane protein  
864 3 blocks fusion of sensitive but not resistant viruses by partitioning into virus-  
865 carrying endosomes. PLoS Pathog 15:e1007532.
- 866 40. Weston S, Czieso S, White IJ, Smith SE, Kellam P, Marsh M. 2014. A  
867 Membrane Topology Model for Human Interferon Inducible Transmembrane  
868 Protein 1. PLOS ONE 9:e104341.
- 869 41. John SP, Chin CR, Perreira JM, Feeley EM, Aker AM, Savidis G, Smith SE,  
870 Elia AEH, Everitt AR, Vora M, Pertel T, Elledge SJ, Kellam P, Brass AL. 2013.  
871 The CD225 domain of IFITM3 is required for both IFITM protein association  
872 and inhibition of influenza A virus and dengue virus replication. Journal of  
873 virology 87:7837-7852.
- 874 42. Barrowman J, Michaelis S. 2009. ZMPSTE24, an integral membrane zinc  
875 metalloprotease with a connection to progeroid disorders. Biol Chem 390:761-  
876 73.
- 877 43. York J, Nunberg JH. 2006. Role of the stable signal peptide of Junín arenavirus  
878 envelope glycoprotein in pH-dependent membrane fusion. J Virol 80:7775-80.
- 879 44. Radoshitzky SR, Abraham J, Spiropoulou CF, Kuhn JH, Nguyen D, Li W, Nagel  
880 J, Schmidt PJ, Nunberg JH, Andrews NC, Farzan M, Choe H. 2007. Transferrin  
881 receptor 1 is a cellular receptor for New World haemorrhagic fever  
882 arenaviruses. Nature 446:92-6.

- 883 45. Rojek JM, Sanchez AB, Nguyen NT, de la Torre JC, Kunz S. 2008. Different  
884 mechanisms of cell entry by human-pathogenic Old World and New World  
885 arenaviruses. *J Virol* 82:7677-87.
- 886 46. Chen D, Hou Z, Jiang D, Zheng M, Li G, Zhang Y, Li R, Lin H, Chang J, Zeng  
887 H, Guo J-T, Zhao X. 2019. GILT restricts the cellular entry mediated by the  
888 envelope glycoproteins of SARS-CoV, Ebola virus and Lassa fever virus.  
889 *Emerging Microbes & Infections* 8:1511-1523.
- 890 47. Radoshitzky SR, Dong L, Chi X, Clester JC, Retterer C, Spurgers K, Kuhn JH,  
891 Sandwick S, Ruthel G, Kota K, Boltz D, Warren T, Kranzusch PJ, Whelan SP,  
892 Bavari S. 2010. Infectious Lassa virus, but not filoviruses, is restricted by BST-  
893 2/tetherin. *J Virol* 84:10569-80.
- 894 48. Huang IC, Bailey CC, Weyer JL, Radoshitzky SR, Becker MM, Chiang JJ, Brass  
895 AL, Ahmed AA, Chi X, Dong L, Longobardi LE, Boltz D, Kuhn JH, Elledge SJ,  
896 Bavari S, Denison MR, Choe H, Farzan M. 2011. Distinct Patterns of IFITM-  
897 Mediated Restriction of Filoviruses, SARS Coronavirus, and Influenza A Virus.  
898 *PLOS Pathogens* 7:e1001258.
- 899 49. Li K, Markosyan RM, Zheng YM, Golfetto O, Bungart B, Li M, Ding S, He Y,  
900 Liang C, Lee JC, Gratton E, Cohen FS, Liu SL. 2013. IFITM proteins restrict  
901 viral membrane hemifusion. *PLoS Pathog* 9:e1003124.
- 902 50. Wrensch F, Ligat G, Heydmann L, Schuster C, Zeisel MB, Pessaux P,  
903 Habersetzer F, King BJ, Tarr AW, Ball JK, Winkler M, Pöhlmann S, Keck ZY,  
904 Fong SKH, Baumert TF. 2019. Interferon-Induced Transmembrane Proteins  
905 Mediate Viral Evasion in Acute and Chronic Hepatitis C Virus Infection.  
906 *Hepatology* 70:1506-1520.
- 907 51. Lin TY, Chin CR, Everitt AR, Clare S, Perreira JM, Savidis G, Aker AM, John  
908 SP, Sarlah D, Carreira EM, Elledge SJ, Kellam P, Brass AL. 2013. Amphotericin  
909 B increases influenza A virus infection by preventing IFITM3-mediated  
910 restriction. *Cell Rep* 5:895-908.

- 911 52. Torriani G, Trofimenko E, Mayor J, Fedeli C, Moreno H, Michel S, Heulot M,  
912 Chevalier N, Zimmer G, Shrestha N, Plattet P, Engler O, Rothenberger S,  
913 Widmann C, Kunz S. 2019. Identification of Clotrimazole Derivatives as Specific  
914 Inhibitors of Arenavirus Fusion. *J Virol* 93.
- 915 53. Richards DA, Guatimosim C, Betz WJ. 2000. Two endocytic recycling routes  
916 selectively fill two vesicle pools in frog motor nerve terminals. *Neuron* 27:551-  
917 9.
- 918 54. Hulseberg CE, Fénéant L, Szymańska KM, White JM. 2018. Lamp1 Increases  
919 the Efficiency of Lassa Virus Infection by Promoting Fusion in Less Acidic  
920 Endosomal Compartments. *mBio* 9.  
921
